## 2 A Wastewater-Based Epidemic Model for SARS-CoV-2 with Application to Three Canadian Cities

4 Shokoofeh Nourbakhsh<sup>1,✉</sup>, Aamir Fazil<sup>1</sup>, Michael Li<sup>1</sup>, Chand S. Mangat<sup>2</sup>, Shelley W. Peterson<sup>2</sup>, Jade Daigle<sup>2</sup>, Stacie Langner<sup>2</sup>, Jayson Shurgold<sup>3</sup>, Patrick D'Aoust<sup>4</sup>, Robert  
6 Delatolla<sup>4</sup>, Elizabeth Mercier<sup>4</sup>, Xiaoli Pang<sup>5,6</sup>, Bonita E. Lee<sup>7</sup>, Rebecca Stuart<sup>8</sup>, Shinthuja Wijayasri<sup>8,9</sup>, David Champredon<sup>1,✉, ✉</sup>

### 8 Affiliations:

1 Public Health Risk Sciences Division, National Microbiology Laboratory, Public Health Agency of Canada,  
10 Guelph, ON, Canada

2 One Health Division, National Microbiology Laboratory, Public Health Agency of Canada, Winnipeg,  
12 MB, Canada

3 Antimicrobial Resistance Division, Infectious Diseases Prevention and Control Branch, Public Health  
14 Agency of Canada, Ottawa, ON, Canada

4 University of Ottawa, Department of Civil Engineering, Ottawa, ON, Canada

16 5 Public Health Laboratory, Alberta Precision Laboratory, Edmonton, AB, Canada

6 Department of Laboratory Medicine and Pathology, University of Alberta, Edmonton, AB, Canada

18 7 Department of Pediatrics, University of Alberta, Edmonton, AB, Canada

8 Toronto Public Health, Toronto, ON, Canada

20 9 Canadian Field Epidemiology Program, Emergency Management, Public Health Agency of Canada

22 ✉: contributed equally

✉: corresponding author ([david.champredon@canada.ca](mailto:david.champredon@canada.ca))

24 **Classification:** Biological Sciences: Population Biology, Environmental Sciences

**Keywords:** epidemic model ; COVID-19 ; environmental surveillance ; wastewater

## 26 **1 Abstract**

28 The COVID-19 pandemic has stimulated wastewater-based surveillance, allowing public  
health to track the epidemic by monitoring the concentration of the genetic fingerprints of  
SARS-CoV-2 shed in wastewater by infected individuals. Wastewater-based surveillance  
30 for COVID-19 is still in its infancy. In particular, the quantitative link between clinical  
cases observed through traditional surveillance and the signals from viral concentrations  
32 in wastewater is still developing and hampers interpretation of the data and actionable  
public-health decisions.

34 We present a modelling framework that includes both SARS-CoV-2 transmission at the  
population level and the fate of SARS-CoV-2 RNA particles in the sewage system after  
36 faecal shedding by infected persons in the population.

Using our mechanistic representation of the combined clinical/wastewater system, we per-  
38 form exploratory simulations to quantify the effect of surveillance effectiveness, public-  
health interventions and vaccination on the discordance between clinical and wastewater  
signals. We also apply our model to surveillance data from three Canadian cities to provide  
40 wastewater-informed estimates for the actual prevalence, the effective reproduction num-  
ber and incidence forecasts. We find that wastewater-based surveillance, paired with this  
42 model, can complement clinical surveillance by supporting the estimation of key epidemio-  
logical metrics and hence better triangulate the state of an epidemic using this alternative  
44 data source.

## 46 2 Introduction

48 Wastewater has been used previously for monitoring of a wide range of behavioural, socio-  
economic and biological markers including: medical and illicit drugs [1, 2, 3]; antibiotic  
50 and antimicrobial resistance [4, 5, 6]; and industrial pollutant chemicals [7, 8]. Spatial  
and temporal screening of the wastewater collection system or “sewershed” can provide  
52 qualitative and quantitative information on the marker of interest within the population  
in a given sewer catchment contributing to the wastewater. The wastewater data when  
used as an index of disease burden can be incorporated into a clinical surveillance program  
54 that is purposeful, economical and action-oriented for public health [9]. Wastewater-based  
surveillance (WBS) has also proven to be a low-cost and non-invasive tool for the manage-  
56 ment of infectious disease pathogens such as norovirus [10, 11] and poliovirus [12, 13, 14]  
where viral concentration in wastewater served to supplement clinical surveillance. Since  
58 the start of the COVID-19 pandemic, SARS-CoV-2 RNA has been detected and quantified  
in sewage in many locations worldwide (as of June 2021, 55 countries have pilot programs  
60 for a wastewater surveillance system with 2,287 sampling sites [15]) and was employed  
successfully in correlating the concentration of SARS-CoV-2 in wastewater to clinical cases  
62 reported in the sewershed [16, 17, 18, 19, 20, 21, 22, 23, 24]. In some instances of targeted  
surveillance, the leading wastewater signal (measured as SARS-CoV-2 RNA concentration  
64 in wastewater) compared to the clinical reports provided an early sign for the introduction  
or resurgence of COVID-19 into a community [25, 26, 27, 28] enabling rapid deployment  
66 of public health response and mitigation efforts.

Despite numerous successes with wastewater-based surveillance during the pandemic, uti-  
68 lizing wastewater surveillance data as a public-health tool for quick response remains chal-  
lenging for some jurisdictions, especially at the municipal level [29, 30]. A major hurdle is  
70 the lack of a quantitative framework to assess and interpret the wastewater data generated  
and to translate that into public health action [31, 32]. The common practice is to use the  
72 detection of SARS-CoV-2 in wastewater as a signal for COVID-19 (re)introduction in a  
community and/or perform trend analysis in parallel with clinical surveillance of COVID-  
74 19. At the time of this manuscript, it is generally not recommended to use SARS-CoV-2  
WBS for direct inference of key epidemiological indicators such as prevalence of active  
76 infections [31, 32, 16, 33].

Public health response guided by SARS-CoV-2 levels in wastewater is currently hindered  
78 by a lack of structured interpretive criteria, which is at present obscured by the inherent  
complexity and variation imparted by diverse sewersheds and their contributing popula-  
80 tions [34, 35, 36]. Sources of data variability includes individual’s shedding dynamics, sam-  
pling frequency of wastewater, non-standardized laboratory methods, sewershed-specific  
82 viral degradation and signal attenuation during its journey from the site of faecal shedding  
(and potentially from urinary or sputum deposit [37, 38]) to the sampling point. Attenu-  
84 ation of RNA signal in wastewater involves several factors, such as dilution in municipal

## Wastewater-Based Epidemic Modelling

---

wastewater constituents (e.g., storm water effects in combined sewers and infiltration effects in both combined and separated sewers), RNA degradation (*e.g.*, due to household detergents and industrial wastewaters) and viral degeneration in the harsh wastewater environment due to temperature, bioactive chemicals, pH, etc. Solids sedimentation and resuspension may also play a key role in the transportation and decay of SARS-CoV-2 RNA because of the hydrophobic characteristics of the viral envelope and its strong associations to solids [39, 33]. In addition, concentration methods for detection enhancement and minimization of inhibitory substances of molecular tests can result in some loss of the viral target [40, 41].

Here, we present a modelling framework that attempts to link quantified SARS-CoV-2 levels in wastewater with estimates of infections in the population within the sewershed, and to support policy decisions. The model incorporates both the viral transmission within the population via a standard epidemiological SEIR-like model (“Susceptible - Exposed - Infectious - Recovered”) [42] and the fate of SARS-CoV-2 in wastewater using a simplified hydrological transport framework. To illustrate potential applications, we fit our model to WBS data and traditional clinical reports gathered from six wastewater treatment plants (WWTPs) located in three Canadian cities (Edmonton, Ottawa and Toronto) and provide wastewater-informed estimates of key epidemiological metrics. We also perform exploratory simulations to investigate how the wastewater signal can be mechanistically associated with clinical surveillance of COVID-19.

### 3 Methods

We develop a mathematical model that mechanistically describes both the transmission at the population level (“above ground”) and the concentration of SARS-CoV-2 in wastewater as a result of faecal shedding from the infected individuals (“below ground”).

#### 3.1 Transmission between individuals

To model SARS-CoV-2 transmission in the population, we use a SEIR-type epidemiological model. The disease progression of individuals is captured through several compartments that reflect their epidemiological states and disease outcomes (Table 1). Individuals can be susceptible ( $S$ ); exposed (infected but not yet infectious,  $E$ ); symptomatically infected who will later become hospitalized ( $J$ ) or recovered without hospitalization during active COVID-19 ( $I$ ); asymptotically infected ( $A$ ); hospitalized ( $H$ ); those recovered and no longer infectious but still shedding virus in faeces ( $Z$ ); fully recovered and permanently immune but not shedding anymore ( $R$ ) and deceased ( $D$ ). We ignore any migration movements, so at any given time the total population is constant and equal to  $N = S + E + J + I + A + H + Z + R + D$ . Infection occurs at a time-dependent transmission rate  $\beta_t$  between infectious (states  $I$ ,  $J$  or  $A$ ) and susceptible individuals ( $S$ ). Once

## Wastewater-Based Epidemic Modelling

infected, susceptible individuals enter the latent (non-infectious) state ( $E$ ) for an average  
 122 duration of  $1/\epsilon$  days, where no faecal shedding occurs. A proportion  $\alpha$  of all infections are  
 asymptomatic. A fraction  $h$  of symptomatic individuals are hospitalized ( $H$ ) for an average  
 124 duration of  $1/\ell$  days and for those, the COVID-19-associated mortality is  $\delta$ . After their in-  
 fectionous period ends, patients enter the post-infection shedding state  $Z$  where SARS-CoV-2  
 126 faecal shedding still occurs for  $1/\eta$  days on average. The exposed ( $E$ ), infectious ( $A$ ,  $I$  and  
 $J$ ) and post-infection shedding ( $Z$ ) states are modelled with a series of sub-compartments  
 128 in order to have their respective sojourn time gamma-distributed [43, 44, 45]. Note that in  
 our model, we make the simplifying assumption that hospitalized patients—assumed mostly  
 130 bedridden and a small fraction of the shedding population—do not contribute significantly  
 to faecal shedding.  
 132 The transmission dynamics are represented by the system of differential equations 1a-1n  
 and illustrated in Figure 1.

$$\dot{S} = -\beta_t S (A + I + J) / N \quad (1a)$$

$$\dot{E}_1 = \beta_t S (A + I + J) / N - n_E \epsilon E_1 \quad (1b)$$

$$\dot{E}_k = n_E \epsilon (E_{k-1} - E_k) \quad 2 \leq k \leq n_E \quad (1c)$$

$$\dot{A}_1 = \alpha \epsilon E - n_A \theta A_1 \quad (1d)$$

$$\dot{A}_k = n_A \theta (A_{k-1} - A_k) \quad 2 \leq k \leq n_A \quad (1e)$$

$$\dot{I}_1 = (1 - h) (1 - \alpha) \epsilon E - n_I \nu I_1 \quad (1f)$$

$$\dot{I}_k = n_I \nu (I_{k-1} - I_k) \quad 2 \leq k \leq n_I \quad (1g)$$

$$\dot{J}_1 = h (1 - \alpha) \epsilon E - n_J \mu J_1 \quad (1h)$$

$$\dot{J}_k = n_J \mu (J_{k-1} - J_k) \quad 2 \leq k \leq n_J \quad (1i)$$

$$\dot{H} = \mu_{n_J} J_{n_J} - \ell H \quad (1j)$$

$$\dot{Z}_1 = n_I \nu I_{n_I} + n_A \theta A_{n_A} - n_Z \eta Z_1 \quad (1k)$$

$$\dot{Z}_k = n_Z \eta (Z_{k-1} - Z_k) \quad 2 \leq k \leq n_Z \quad (1l)$$

$$\dot{R} = n_Z \eta Z_{n_Z} + (1 - \delta) \ell H \quad (1m)$$

$$\dot{D} = \delta \ell H \quad (1n)$$

134

where  $A = \xi \sum_{k=1}^{n_A} \phi_k A_k$ ,  $I = \sum_{k=1}^{n_I} \psi_k I_k$  and  $J = \sum_{k=1}^{n_J} \psi_k J_k$ . We use the dot notation to  
 136 symbolize derivation with respect to time (e.g.,  $\dot{S} = dS/dt$ ).

## Wastewater-Based Epidemic Modelling

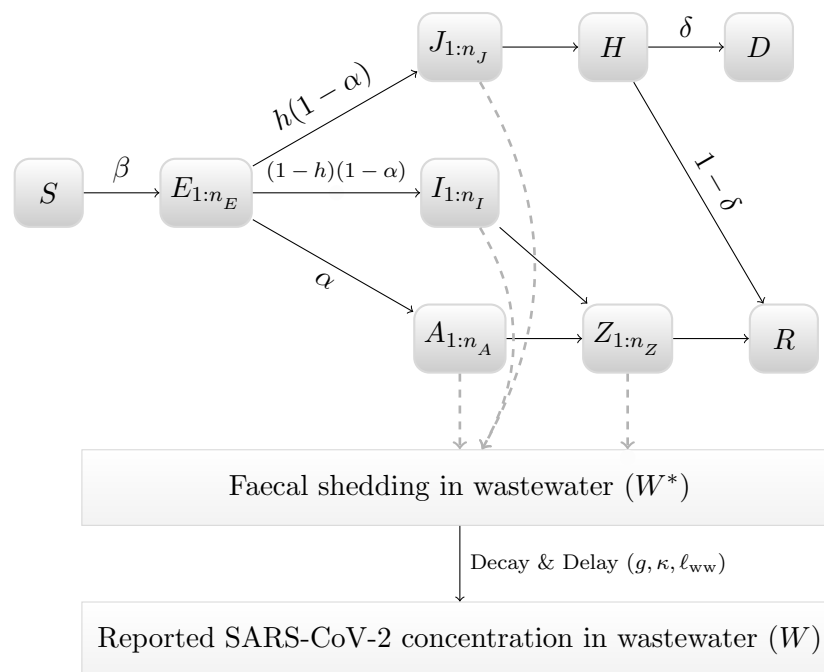

Figure 1: Diagram of compartmental model. See main text for a description of the epidemiological states. The notation  $1 : n_{\bullet}$  indicates a modelling using  $n_{\bullet}$  sub-compartments to obtain a gamma-distributed sojourn time in the associated epidemiological state.

The parameters  $\phi$  and  $\psi$  are multiplicative adjustments to the baseline transmission rate  $\beta_t$  to represent the infectious profile during the course of infection. The values for  $\phi_k$  and  $\psi_k$  were chosen to represent the best estimate of the temporal infectiousness profile given the different results published (see Appendix, Figure S2). The parameter  $\xi$  models the relative infectiousness of asymptomatic cases compared to symptomatic ones. The effective reproduction number of this model is (see Appendix for details on its calculation):

$$\mathcal{R}_t = \beta_t \left( \alpha \xi \frac{1}{\theta} + (1-h)(1-\alpha) \frac{1}{\nu} + h(1-\alpha) \frac{1}{\mu} \frac{\sum_{k=1}^{n_J} \psi_k}{n_I} \right) \frac{S_t}{N} \quad (2)$$

## 3.2 SARS-CoV-2 viral concentration in wastewater

### 3.2.1 Deposited Viral Concentration

The daily concentration of SARS-CoV-2 in wastewater is directly calculated from the total number of individuals that are actively shedding into the sewage system. SARS-CoV-2 faecal shedding varies according to the infected individual's clinical state and disease outcomes. Depending on the disease progression, infected individuals shed a variable amount

## Wastewater-Based Epidemic Modelling

---

of SARS-CoV-2 while they are in the shedding states ( $A$ ,  $I$ ,  $J$  and  $Z$ ). The total concentration of SARS-CoV-2 RNA entering the wastewater at time  $t$  is given by

$$W^*(t) = \omega \times \left( \sum_{k=1}^{n_J} \lambda_k J_k(t) + \sum_{k=1}^{n_I} \lambda_k I_k(t) + \xi \sum_{k=1}^{n_A} \lambda_k^A A_k(t) + \sum_{k=1}^{n_Z} \lambda_k^Z Z_k(t) \right) \quad (3)$$

The parameters  $\lambda_k$ ,  $\lambda_k^A$  and  $\lambda_k^Z$  represent SARS-CoV-2 faecal shedding dynamics per capita when the infected individual is in the epidemiological states  $I$ ,  $J$ ,  $A$  and  $Z$  respectively. Given the current lack of observational data, we used the same parameters  $\lambda_k$  for all epidemiological states (*i.e.*,  $\lambda_k = \lambda_k^A = \lambda_k^Z$ ). Values for the parameters  $\lambda_k$  were chosen to represent mid-range values of the different results published (see Appendix [Figure S2](#)). Note that we assume the same reduction in faecal shedding as in respiratory shedding for asymptomatic cases (parameter  $\xi$ ). The parameter  $\omega$  implies that our model can only determine up to a constant the concentration of SARS-CoV-2 in wastewater [14], even if the limit of detection of the assay is known. This reflects our current inability to quantify the various complex processes that affect the concentration, from patients' shedding to the concentration measured in laboratories (*e.g.*, frequency and timing of sampling, RNA degradation in the sewer system, recovery efficiency of assays).

### 3.2.2 RNA transport and sampled viral concentration

We use a simple advection-dispersion-decay model to simulate the fate of SARS-CoV-2 along its journey in wastewater from the shedding points to the sampling site. This model is a combination of an exponential viral decay [46] and a  $\tau$ -day dispersed plug-flow function,  $g(\tau)$ , representing all possible hydrodynamic processes (*e.g.*, dilution, sedimentation and resuspension) that leads to RNA degradation as well as decrease and delay of signal at the time of sampling. The dispersed plug-flow  $g(\tau)$  acts as a transformation function, which reshapes the initial deposited concentration,  $W^*$ , into a delayed viral distribution over  $\tau$  days as a result of the transit of SARS-CoV-2 in the sewer system. Hence, we defined the sampled viral concentration at time  $t$  as:

$$W_{\text{samp}}(t) = \int_0^t W^*(t - \tau) g(\tau) e^{-\kappa\tau} d\tau, \quad (4)$$

where  $\kappa$  is the daily decay rate of SARS-CoV-2 due to the harsh, complex and bioactive environment of wastewater [46]. The SARS-CoV-2 RNA concentration entering the sewage system daily is modelled as a single hydrodynamic pulse per day and the plug-flow function,  $g$ , is obtained by the analytical solution of the axial dispersed plug flow differential equation [47]. We then re-parametrize the analytical solution with the mean delay time  $\bar{\tau}$  and its standard deviation  $\sigma$  into a Gaussian distribution

$$g(\tau) = \frac{1}{\sqrt{2\pi}\sigma} \exp\left(-\frac{(\tau - \bar{\tau})^2}{2\sigma^2}\right). \quad (5)$$

## Wastewater-Based Epidemic Modelling

---

See the Appendix for more details on our advection-dispersion-decay model of the RNA  
180 transport.

### 3.2.3 Wastewater reported sample

182 The sample transportation, laboratory processing time and reporting lags, introduce re-  
reporting delays of RNA concentration in wastewater. Hence, we define the reported wastew-  
184 ater concentration as

$$W(t) = W_{\text{samp}}(t - \ell_{\text{ww}}), \quad (6)$$

where  $\ell_{\text{ww}}$  is the reporting lag between wastewater sampling and concentration report  
186 after laboratory analysis. (Note that the reporting delay of the wastewater measurement is  
independent from the delay caused by the transport of RNA particles in the sewer system  
188 as defined in [Equation 4](#)).

### 3.3 Clinical reported cases

190 We also model surveillance data derived from laboratory confirmed and clinically diagnosed  
COVID-19 cases, acknowledging that instantaneous identification and complete reporting  
192 after initial infection is not possible. We assume that a fraction  $\rho$  of symptomatic incidence  
is reported with a lag of a  $\ell_{\text{clinical}}$  days from the time of infection. If  $i(t)$  is the total incidence  
194 at time  $t$ , we define the number of clinical cases reported at time  $t$  as:

$$C(t) = \rho(1 - \alpha)i(t - \ell_{\text{clinical}}), \quad (7)$$

### 3.4 Wastewater and clinical surveillance data

196 We apply our modelling framework to data sets from six wastewater sampling sites located  
in three Canadian cities: Edmonton (Alberta), Ottawa (Ontario) and Toronto (Ontario).  
198 Sampling sites are the following municipal WWTPs (abbreviation / approximate popula-  
tion served): Gold Bar in Edmonton (EGB / 900,000); Robert O. Pickard Environmental  
200 Centre in Ottawa (OTW / 1,000,000 [48]); Toronto Ashbridges Bay (TAB / 1,603,700 [49]);  
Toronto Humber (THU / 685,000 [50]); Toronto Highland Creek (THC / 533,000 [51]); and  
202 Toronto North Toronto (TNT / 252,530 [52]).

#### 3.4.1 Data collection

204 Wastewater samples were collected approximately two (Edmonton and Toronto) to seven  
(Ottawa) times a week. The sampling location was at the influent of the wastewater  
206 treatment plant of each city. Wastewater samples were collected before de-gritting in  
Toronto, and after for Edmonton and Ottawa.



## Wastewater-Based Epidemic Modelling

---

208 Wastewater samples from Edmonton and Toronto were shipped to the National Micro-  
biology Laboratory in Winnipeg, Manitoba, where SARS-CoV-2 RNA concentration was  
210 measured. RNA from wastewater samples was purified using two methods. Prior to Febru-  
ary 12th 2021, 15 mL of clarified supernatant (after  $4000 \times g$  centrifugation for 20 min  
212 at  $4^\circ\text{C}$ ), was concentrated using an ultracentrifugal filter device ( $4000 \times g$  for 35 min at  
 $4^\circ\text{C}$ ) (Amicon Ultra-15, 10 kDa MWCO, Millipore-Sigma, St. Louis, MO, U.S.A). Total  
214 RNA was extracted from the resultant concentrate ( $\sim 200 \mu\text{L}$ ) using the MagNA Pure 96  
DNA and Viral NA Large Volume Kit (Roche Diagnostics, Laval, QC) using the Plasma  
216 External Lysis 4.0 protocol as per manufacturer instructions. After February 12th 2021,  
the pellet resultant from clarifying ( $4000g$  for 20 minutes at  $4^\circ\text{C}$ ) 30 mL of wastewater  
218 was resuspended in  $700 \mu\text{L}$  Qiagen Buffer RLT (Qiagen, Germantown, MD) containing 1%  
2-mercaptoethanol. To this,  $200 \mu\text{L}$  of 0.5 mm zirconia-silica beads (Biospec, Bartlesville,  
220 OK) were added and the sample was processed with a Bead Mill 24 Homogenizer (Fisher  
Scientific, Ottawa, ON) using  $4 \times 30\text{s}$  pulses at 6 m/s, then clarified by centrifugation  
222 ( $12000 \times g$ , 3 min) and the resultant lysate used for RNA extraction using the MagNA  
Pure 96 instrument as described above. Viral RNA was quantified using RTq-PCR with  
224 the US-CDC N1 and N2 primers.

For Ottawa, daily 24-hour composite primary sludge samples, consisting of four discrete  
226 samples collected at 6 hour intervals and subsequently mixed, were collected and trans-  
ported on ice to the University of Ottawa, where samples were analyzed within 24 hours  
228 of reception. Samples were concentrated by centrifugation at  $10,000g$  for 45 minutes and  
RNA was extracted from a 250 mg portion of the resulting pellet using a modified ver-  
230 sion of the Qiagen RNeasy PowerMicrobiome kit [28]. Quantification was performed using  
singleplex probe-based RTq-PCR for the N1 and N2 gene regions of the virus.

232 For Edmonton and Toronto, the SARS-CoV-2 concentrations in wastewater were normal-  
ized by the total solid suspension (TSS) measured on the day the sample was collected  
234 at the treatment plant. For Ottawa, they were normalized with the concentration of the  
Pepper mild mottle virus measured in the sample. For all cities, the reported viral con-  
236 centration used in the model ( $W$ ) was the average normalized concentration across all  
technical replicates for both the N1 and N2 genes.

238 We obtained clinical cases and hospital admissions (except for Toronto) for the catchment  
area of each of the six wastewater treatment plants. Hence, we were able to link clinical  
240 and wastewater surveillances. The data sets for the three cities are plotted in [Figure 2](#)  
Seroprevalence values at the city and province level were obtained from Canadian Blood  
242 Services (CBS) [53]. The wastewater and clinical surveillance data used in this study are  
available in Supplementary File S1.

## Wastewater-Based Epidemic Modelling

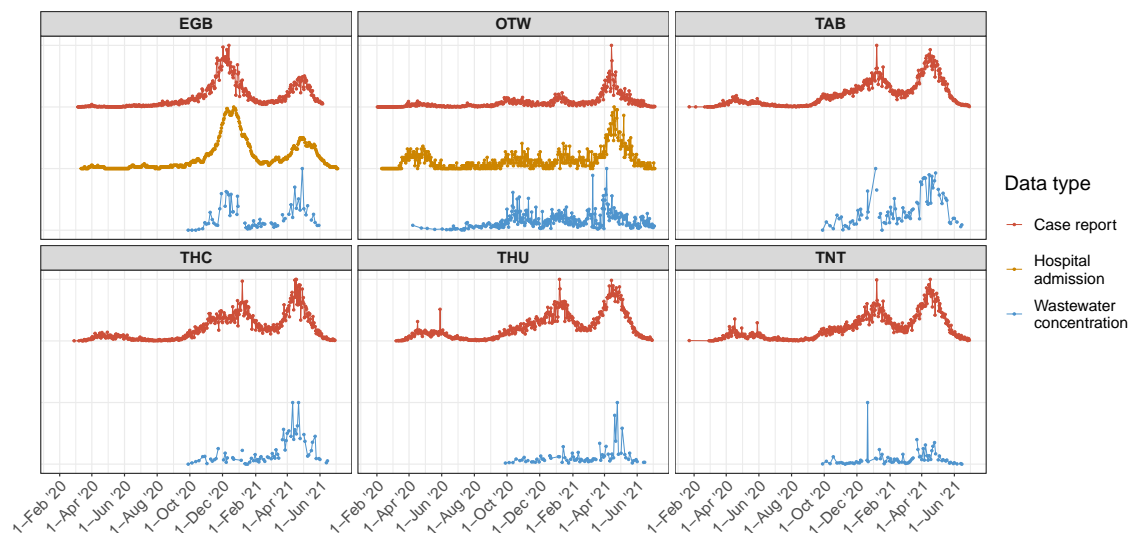

Figure 2: Data sets used in this study for Edmonton, Ottawa and Toronto. Each horizontal panel is a city and colors represent the type of data (reported cases, hospital admissions and SARS-CoV-2 RNA concentration in wastewater). All curves were normalized to 1 (dividing by their respective maximum value) to plot them in one single panel to facilitate visual comparison. All data sets used in this study are available in Supplementary File S1.

## Wastewater-Based Epidemic Modelling

---

### 244 3.4.2 Fit to data

We use an Approximate Bayesian Computation (ABC) algorithm [54] to fit the unknown or unobserved model parameters to the available data. For each ABC prior iteration, the error function is defined as a weighted trajectory matching

$$e_i = w_C(C - C_{\text{obs}})^2 + w_H(H - H_{\text{obs}})^2 + w_W(W - W_{\text{obs}})^2 \quad (8)$$

248 We use 50,000 prior ABC iterations and retain the 100 smallest errors to generate posterior distributions (acceptance ratio  $2 \times 10^{-3}$ ). The parameters fitted are the time-dependent transmission rate  $\beta_t$ ,  $\omega$ , the hospitalization rate  $h$  and the mean transit time  $\bar{\tau}$ . More details about the fitting procedure is given in Appendix.

252 We define three types of fitting-to-data procedures. “Clinical” when  $w_C = w_H = 1$  and  $w_W = 0$ , to use data from clinical sources only; “WW” when  $w_W = 1$  and  $w_H = w_C = 0$ , to use wastewater data only; and finally “Combined” by choosing the weights  $w_C, w_H$  and  $w_W$  such that the contribution of each error term (in Equation 8) are, on average, approximately equal. The “Combined” fitting procedure aims to have approximately the same contribution from clinical and wastewater data sources (despite the different observation frequencies).

### 3.4.3 Inference of unobserved epidemiological quantities

260 For a given location, once the model is fitted data, we can infer unobserved quantities of epidemiological importance by generating epidemic trajectories from the posterior samples. The posterior prevalence distribution (at each time point) is defined by simply adding the populations from the compartments representing active infection, that is

$$\text{prev}(t) = E + \sum_{i=1}^{n_A} A_i + \sum_{i=1}^{n_I} I_i + \sum_{i=1}^{n_J} J_i + H \quad (9)$$

264 The posterior cumulative incidence is obtained by summing Equation 1a until time  $t$

$$\text{cuminc}(t) = - \sum_{i=1}^t \dot{S}_i \quad (10)$$

The fitted model can also provide an estimate of the effective reproduction number from the different data sources (e.g., clinical and/or wastewater) using Equation 2.

## 3.5 Simulations

### 268 3.5.1 Detection timing differential

In order to explore wastewater-based surveillance as a leading indicator of infection in the community, the time when SARS-CoV-2 is first reported from wastewater is noted

## Wastewater-Based Epidemic Modelling

---

$d_{\text{ww}}$  and defined as  $W(t = d_{\text{ww}}) = \text{LOD}$  where LOD is the limit of detection of the laboratory method. In addition, the time  $d_{\text{clinical}}$  when COVID-19 is first reported is defined as  $C(t = d_{\text{clinical}}) = 1$ . Finally, we define the reported detection differential  $\Delta = d_{\text{ww}} - d_{\text{clinical}}$ . As a result, the wastewater signal can be classified as a leading indicator over traditional clinical surveillance when  $\Delta < 0$ . We assess how the reported detection differential  $\Delta$  can be impacted by varying model parameters that would typically differ from one community-sewer system to another. We select only three combinations of parameters (among many) to illustrate how  $\Delta$  can be affected, and most importantly how its sign can change indicating its transition between a leading and lagging indicator. We consider two levels of COVID-19 reporting, with  $\rho = 30\%$  to reflect a relatively inefficient clinical surveillance system in the population, and  $\rho = 70\%$  that represents a more efficient one.

### 3.5.2 Impact of vaccination

Although the model presented here does not explicitly have a vaccination process, a mechanism using the existing framework can be implemented to mimic the main effects of an infection-permissive vaccine (as this is the case for the COVID-19 vaccines currently available). We model a simple scenario that rolls out an infection permissive vaccine by gradually decreasing the transmission rate ( $\beta$ ) by 70% over 50 days and increasing the proportion of asymptomatic infection ( $\alpha$ ) from 30% to 90%. This reflects the growing protection of the population from severe outcomes of COVID-19 as well as decrease in transmissions as the vaccine is administered. To assess the differential impact of vaccination on clinical and wastewater observations, we consider the ratio of the level of SARS-CoV-2 in wastewater over the reported clinical cases,  $W(t)/C(t)$ .

## 4 Results

We present our results in two sections. First, we apply our modelling framework to wastewater and clinical surveillance data from six sampling sites located in three Canadian cities (Edmonton, Ottawa and Toronto) and infer epidemiological parameters such as prevalence, effective reproduction number and incidence forecast. The second section is based on exploratory simulations (not fitted to data of a specific location) that highlight important mechanistic aspects between clinical and wastewater surveillances.

### 4.1 Application to Canadian surveillance data

In this section, we compare the inferences made on key epidemiological variables by fitting the model to different data sources. Our goal is to assess the added-value of the wastewater-based data stream. Hence, in the following, we present inferences by fitting the model to different data sources available (“Clinical”, “WW” and “Combined”) and comparing the outcomes.

## Wastewater-Based Epidemic Modelling

---

### 306 4.1.1 Prevalence estimates

308 **Figure 3** shows, for selected locations, the SARS-CoV-2 prevalence estimated by sampling  
310 the posterior distributions fitted to the various data sources “Clinical”, “WW” and “Com-  
312 bined” and the evaluation of **Equation 9**. The right-most panel also displays estimates of  
314 cumulative incidence (**Equation 10**) compared to available SARS-CoV-2 seroprevalence lev-  
316 els estimated from surveys by the Canadian Blood Services performed on banks of blood  
318 donors in Edmonton, Ottawa and Toronto [53]. Note that our model was not fitted to  
320 seroprevalence data and this comparison acts as a crude check that prevalence estimates  
322 from the model are approximately consistent with other independent data sources. For all  
324 locations, as expected, wastewater-only prevalence estimates are close to the clinical-only  
326 ones when the levels of SARS-CoV-2 in wastewater mimic the COVID-19 trends in the  
population (**Figure 2**). For example, the prevalence estimated from wastewater-only and  
clinical-only are comparable for the December 2020 wave in Edmonton and April 2021 wave  
in Ottawa. However, when the clinical and wastewater signals are discordant, prevalence  
estimates can be significantly different. For example, wastewater-based prevalence esti-  
mates in January 2021 for Toronto Highland Creek (THC) do not show the peak seen from  
clinical observations. On the other hand, this January peak was captured in Toronto Ash-  
bridges Bay (TAB)—another part of the city—and the subsequent March-May 2021 wave in  
Toronto Highland Creek (THC) was identified by both wastewater and clinical surveillance.  
Finally, we note that, because of the larger variability of SARS-CoV-2 WBS and/or their  
lower sampling frequency as compared to daily clinical surveillance, credible intervals of our  
wastewater-only inferences are generally larger than the clinical-only ones (**Figure 3**).

### 328 4.1.2 Effective reproduction number

The effective reproduction number ( $\mathcal{R}_t$ ) is a key epidemiological parameter that has gained  
330 recognition and application during the COVID-19 pandemic [55, 56]. Using the same ap-  
332 proach as for prevalence estimates, we inferred  $\mathcal{R}_t$  from epidemic trajectories generated  
334 from posterior distributions fitted to the three different data sources (*i.e.*, “Clinical”,  
“WW” and “Combined”) and **Equation 2**. For comparison, we also calculate  $\mathcal{R}_t$  using  
336 the popular R package EpiEstim (version 2.2) [57] from the reported clinical cases as  
338 a separate approach. Results shown in **Figure 4** exhibit the same behaviour as for the  
340 prevalence estimates, that is, mean estimates of  $\mathcal{R}_t$  are similar when trends of clinical  
and wastewater surveillance are comparable. Despite being based on a different modelling  
framework, estimates from EpiEstim are consistent with clinical-only estimates from our  
model. Finally, like for prevalence inferences,  $\mathcal{R}_t$  estimates from wastewater-only data  
(**Figure 4**, blue solid line) tend to have broader uncertainty interval compared to  $\mathcal{R}_t$  from  
clinical-only data.

## Wastewater-Based Epidemic Modelling

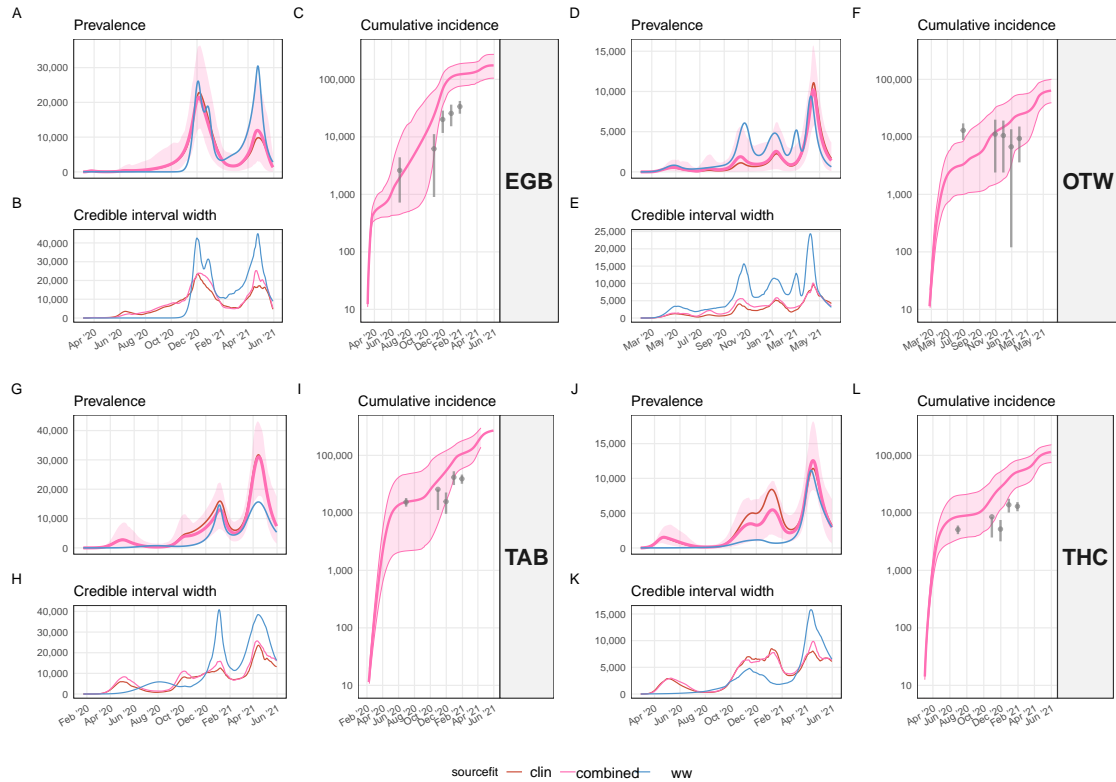

Figure 3: SARS-CoV-2 prevalence estimates. Each quadrant block represents a location. The top-left panel of each quadrant block (panels A,D,G,J) shows the estimates of SARS-CoV-2 prevalence time series. Each colour represents the different data sources used to fit the model (dark red: “Clinical”, pink: “Combined”, blue: “WW”). The lines show the mean estimate of prevalence. The shaded ribbon indicates the 95% CrI for the estimate fitted on the “Combined” data set (CrIs for other data sources are omitted for clarity). The bottom-left panel of each quadrant block (panels B,E,H,K) represents the width of the 95% CrI for the estimates fitted on the different data sets (using the same colour code as the panel for prevalence). The right-most panel of each quadrant block (panels C,F,I,L) compares the cumulative incidence estimated by the model fitted on the “Combined” data set to seroprevalence levels reported by the Canadian Blood Services for each city (grey point indicates the mean, the vertical grey bars show the 95% confidence intervals).



## Wastewater-Based Epidemic Modelling

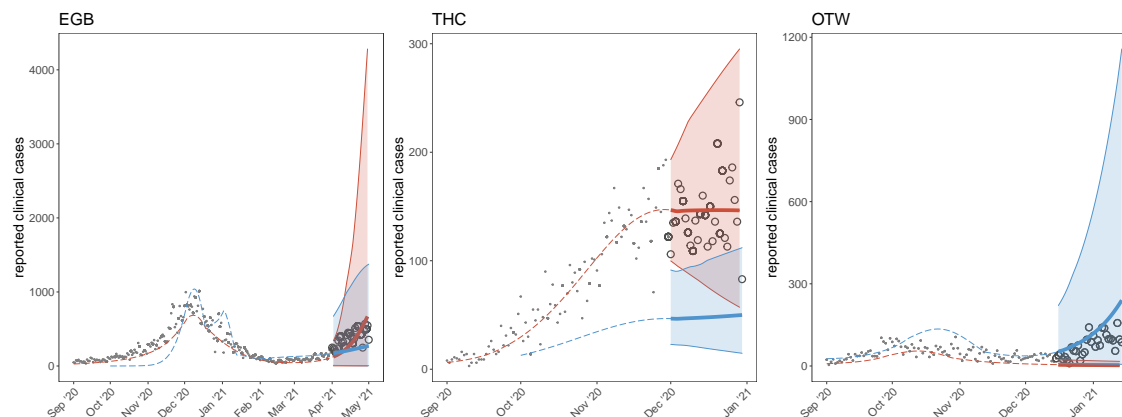

Figure 5: Forecast examples for Edmonton (left panel), Toronto/Highland Creek (middle panel) and Ottawa (right panel). Filled points represent past data of reported clinical cases. Circles represent reported clinical cases not yet observed at the time of forecast. Colour represents the type of data the model was fitted to (blue, wastewater only; red, clinical data only). Dashed coloured lines indicate the fitted mean for reported cases. The thick solid line shows the 1-month-ahead mean forecast, and the shaded areas their respective 95%CrI.

### 342 4.1.3 Forecasts

Another key advancement in our modelling framework is to generate forecasts based on  
344 clinical, hospital (if available) and wastewater data.

In Figure 5 we show three 1-month-ahead forecasting examples for Edmonton, Toronto  
346 Highland Creek and Ottawa using either wastewater data only, or clinical data only. The  
Edmonton example (Figure 5, left panel) shows forecasts made as of April 1st, 2021. In  
348 this case, the forecasts are relatively similar because both the clinical reports and the  
wastewater signals are comparable and the model fits were similar using either wastewater  
350 or clinical data. The Toronto Highland Creek example forecasts as of November 30th,  
2020 (Figure 5, middle panel). For this location, the wastewater signal and clinical reports  
352 are discordant from December 2020 to February 2021. During this period the wastewater  
concentration is low and approximately flat whereas the clinical reports indicate a new  
354 wave of infections. As a result, the model fitted on these two data sources interprets the  
epidemic differently for this period and hence provides contrasting forecasts. The forecast  
356 for Ottawa as of December 15th, 2020 (Figure 5, right panel) illustrates the case when  
the wastewater forecast is more accurate than the one based on clinical surveillance only.  
358 At that time, the wastewater signal in Ottawa has picked up a resurgence earlier than  
clinical surveillance. This resurgence is then captured by the model fit and hence the  
360 wastewater-based forecast correctly projects the resurgence.



## 4.2 Simulations

362 In this section, we report results from simulations that provide general insights in interpreting WBS.

### 364 4.2.1 Leading signal and reported detection differential

We vary the LOD of the wastewater assay across a broad, but realistic, range [58] and  
366 calculate  $\Delta$ , the detection time difference, for each simulation for a given value of LOD  
and the clinical reporting rate  $\rho$ . Because SARS-CoV-2 RNA concentration in wastewater  
368 can only be determined up to a constant in our model, the LOD values chosen here are  
rescaled to the parameters used to run our simulations and cannot be directly interpreted  
370 as RNA copies per ml, the traditional unit for LOD. Panel A in Figure 6 shows that,  
depending on the LOD of the laboratory assay, the wastewater concentration of SARS-  
372 CoV-2 RNA can either be a leading ( $\Delta < 0$  for assays with low LODs) or a trailing  
indicator of cases (re)introduction when compared to reported clinical cases. This is the  
374 case whether the clinical surveillance system in the population is efficient or not (coloured  
curves, Figure 6A).

376 We also vary the decay rate of RNA SARS-CoV-2 in wastewater within a broad realistic  
range [46, 59, 60], as well as the transit time of SARS-CoV-2 between the shedding and  
378 sampling sites. Figure 6B shows that, here again, the relative timing of (re)introduction  
detection by WBS compared to clinical surveillance can be affected by both the harshness  
380 of the wastewater (represented by the decay rate) and the transit time of SARS-CoV-2 in  
the sewer system. We note, as expected, that with a fast transit time (illustrated by a 1-  
382 day travel time in the left-most panel of Figure 6) the decay rate will not have a significant  
impact on  $\Delta$  clinical surveillance (efficient,  $\rho = 70\%$ , or not,  $\rho = 30\%$ ), but as the transit  
384 time increases to 3 days (an upper bound considering strong sediment and recirculation  
effects) the effect of RNA decay becomes more important (increasing slope for the 1-day  
386 and 3-day transit times, Figure 6B).

### 4.2.2 Assessing public health intervention effectiveness

388 The ability to use wastewater signal to detect intervention effectiveness can also be explored  
using model simulations in order to explore if a public health intervention is more clearly  
390 observable in wastewater concentration measurements or in clinical reports. To do this,  
we choose to model an intervention such that the transmission rate  $\beta$ , constant until  
392 the intervention time, decreases linearly to a lower value  $\beta/3$  during a period of time of  
 $T_{\text{interv}}$  and remains constant afterwards (this aims to crudely simulate a lockdown). We  
394 consider the relative difference between the observed peak and 7 days later for COVID-  
19 by clinical surveillance,  $s_{\text{cl}}(t) = C(t+7)/C(t) - 1$  and the level of SARS-CoV-2 in  
396 wastewater,  $s_{\text{ww}} = W(t+7)/W(t) - 1$ . The more negative the slope, the clearer the

## Wastewater-Based Epidemic Modelling

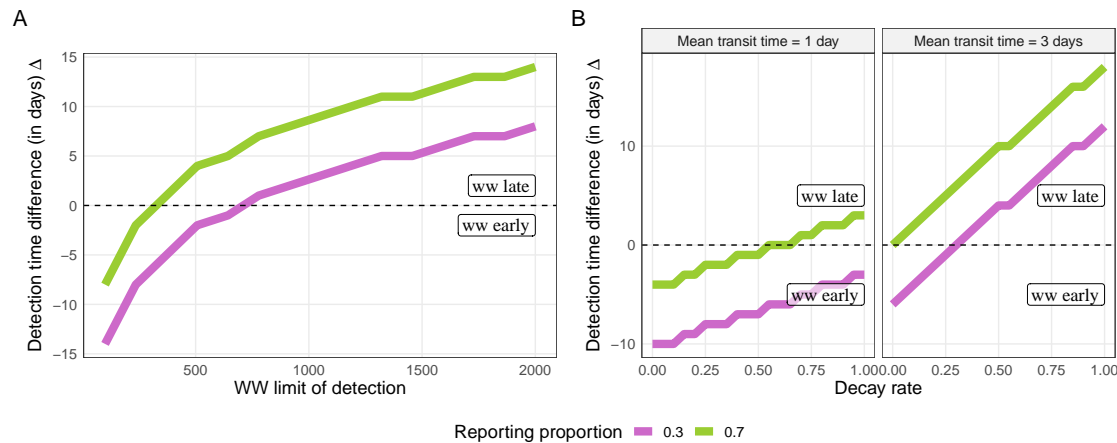

Figure 6: Simulations were run varying selected parameters to show their impact on the reported detection time differential ( $\Delta$ ). Panel A: effect of the limit of detection of the quantification assay performed on wastewater. Values below the 0-intercept horizontal dashed line indicate a leading signal from wastewater concentrations than from clinical reports. Panel B: effect of the SARS-CoV-2 RNA decay rate in wastewater for different transit times between the shedding and sampling site. The colour of the curves represents the proportion of clinical cases reported ( $\rho$ ) out of the total symptomatic incidence.

signal.

398 Using our baseline parameters (Table 2), we simulate an intervention that reduces the  
 400 contact rate to a third of its pre-intervention value at different time of the simulations,  
 ranging from 20 to 90 days after the introduction of the index case. Figure 7 shows  
 that, overall, the effect of an intervention that significantly reduces transmission yields a  
 402 larger relative decrease in number of COVID-19 cases than the level of SARS-CoV-2 in  
 wastewater because the post-peak slope from clinical surveillance ( $s_{cl}$ ) is consistently more  
 404 negative than the one from WBS ( $s_{ww}$ ). The difference is more pronounced as the change  
 in transmission is more sudden ( $T_{interv}$  small). Hence, given the observation noise typically  
 406 encountered, we expect that the effect of a sudden change in transmission rate would be  
 more clearly observable from clinical surveillance than from WBS.

### 4.2.3 Differential impact of vaccination

In Figure 8 shows how  $W(t)/C(t)$ , the ratio of reported wastewater concentration over  
 410 reported cases, increases following vaccination with an infection-permissive vaccine. Indeed,  
 while an infection-permissive vaccine does reduce transmission, it still allows for infections  
 412 to occur (mostly asymptomatic) and in particular, faecal shedding. Hence, a smaller pro-  
 portion of infections are reported (because most of them are asymptomatic) but faecal

## Wastewater-Based Epidemic Modelling

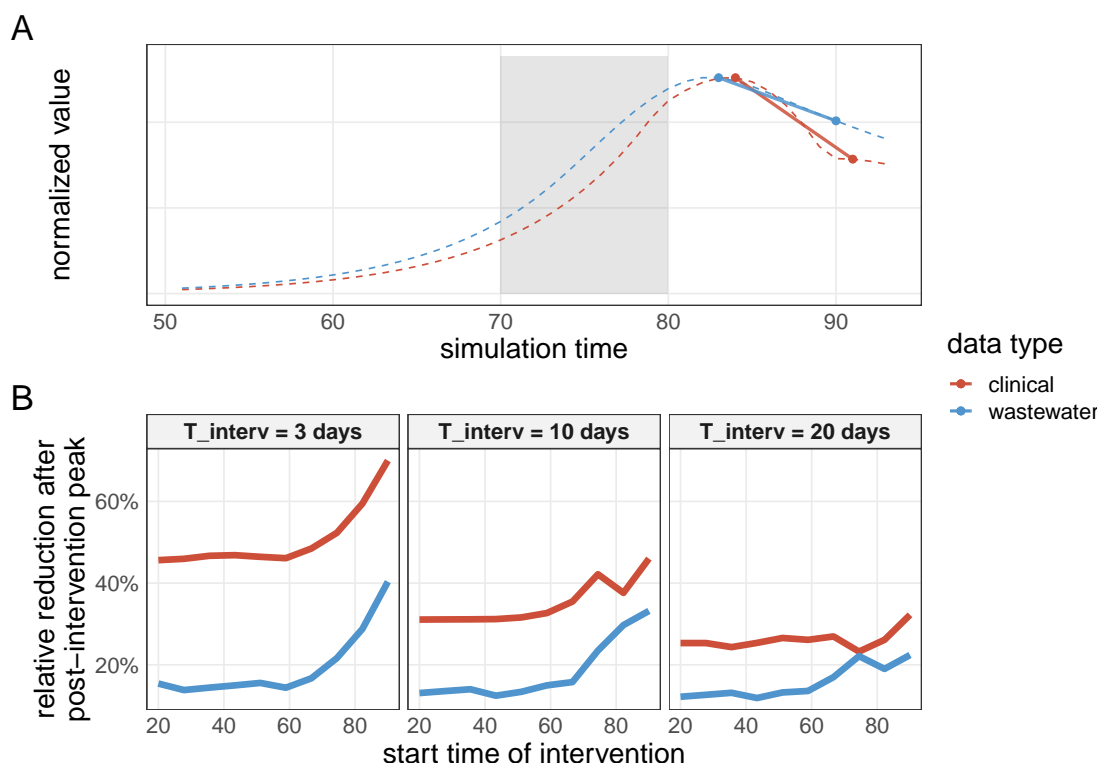

Figure 7: Detectability of a sharp transmission reduction. Panel A: example of how the post-peak relative changes are calculated. The colour-coded dashed lines represent the time series of reported clinical cases and SARS-CoV-2 RNA concentration in wastewater. The shaded area indicates when the transmission rate linearly decreases to a third of its baseline value (here,  $T_{\text{interv}} = 10$  days). The segment illustrates the relative change between the peak value and 7 days later ( $s_{\text{ww}}$  and  $s_{\text{cl}}$ ). Panel B: the horizontal axis represents the time (since the start of the epidemic) when starts the intervention that reduces transmission to a third of its value. The vertical axis represents the post-peak relative changes from clinical reports ( $s_{\text{cl}}$ , red lines) or wastewater ( $s_{\text{ww}}$ , blue lines). Each panel indicates a different value (3, 10 and 20 days) for  $T_{\text{interv}}$ , the time it takes to reduces the transmission rate to a third of its initial value.

## Wastewater-Based Epidemic Modelling

---

414 shedding is less affected by this reporting bias and level of SARS-CoV-2 in wastewater  
415 decreases less steadily than COVID-19 surveillance. In this simulation, the approximately  
416 constant ratio before the start of vaccination (Figure 8B) indicates that reports from clinical  
417 or wastewater data sources provide a similar picture of the epidemic for that period.  
418 However, once vaccination is implemented, the increasing ratio highlights a discordance  
between the two data sources.

## 420 5 Discussion

Surveillance through detection and quantification of targeted pathogens in wastewater has  
422 been a noteworthy tool for public health across the world [61, 16, 18, 10, 11, 12, 13, 14].  
While pathogen surveillance in wastewater is not new, the scale and urgency of scientific  
424 development for WBS are witnessed during the unprecedented COVID-19 pandemic. Because  
of the novelty of SARS-CoV-2-related WBS and the lack of quantitative tools for  
426 analysis, the interpretation of levels SARS-CoV-2 in wastewater and their translation into  
actionable public health measures is still challenging [31, 32, 16, 33].

428 Here, we have provided a modelling framework to improve the understanding of the mechanisms  
at play between the viral transmission in the population and viral concentration  
430 shed in wastewater. This model can also provide estimates of key unobserved epidemiological  
parameters. We demonstrated the applicability of our model by fitting it to data from  
432 three Canadian cities and made wastewater-informed inferences of important epidemiological  
metrics (prevalence, effective reproduction number and forecasted incidence). Our  
434 estimates for cumulative incidence were approximately in line with seroprevalence levels  
from cohorts of blood donors independently observed in the three cities.

436 Importantly, we observed that estimates based on wastewater-only data usually provide a  
similar picture of the epidemic trajectory (Figure 3) but discordant signals can occur and  
438 lead to drastically different interpretations. This was the case, for example, in January  
2021 in Toronto Highland Creek where the wastewater signal did not indicate a resurgence  
440 of infections, despite the wave observed from the reported clinical cases. We believe this  
muted peak in wastewater signal was not caused by a laboratory issue, but rather from  
442 undetermined events in this particular sewershed at that specific time that need to be  
further investigated.

444 Similarly, the effective reproduction numbers inferred from wastewater data only are consistent  
with more traditional methods, such as using clinical reports with the popular software  
446 EpiEstim (Figure 4). The fact that wastewater data can potentially act as a substitute  
for clinical surveillance (albeit with more uncertainty) to provide critical epidemiological  
448 metrics is encouraging, although more realistically, it will likely act as a complementary  
data source. The ability to estimate epidemiological metrics using wastewater surveillance  
450 represents a step forward in demonstrating the use of wastewater data for actionable pub-

## Wastewater-Based Epidemic Modelling

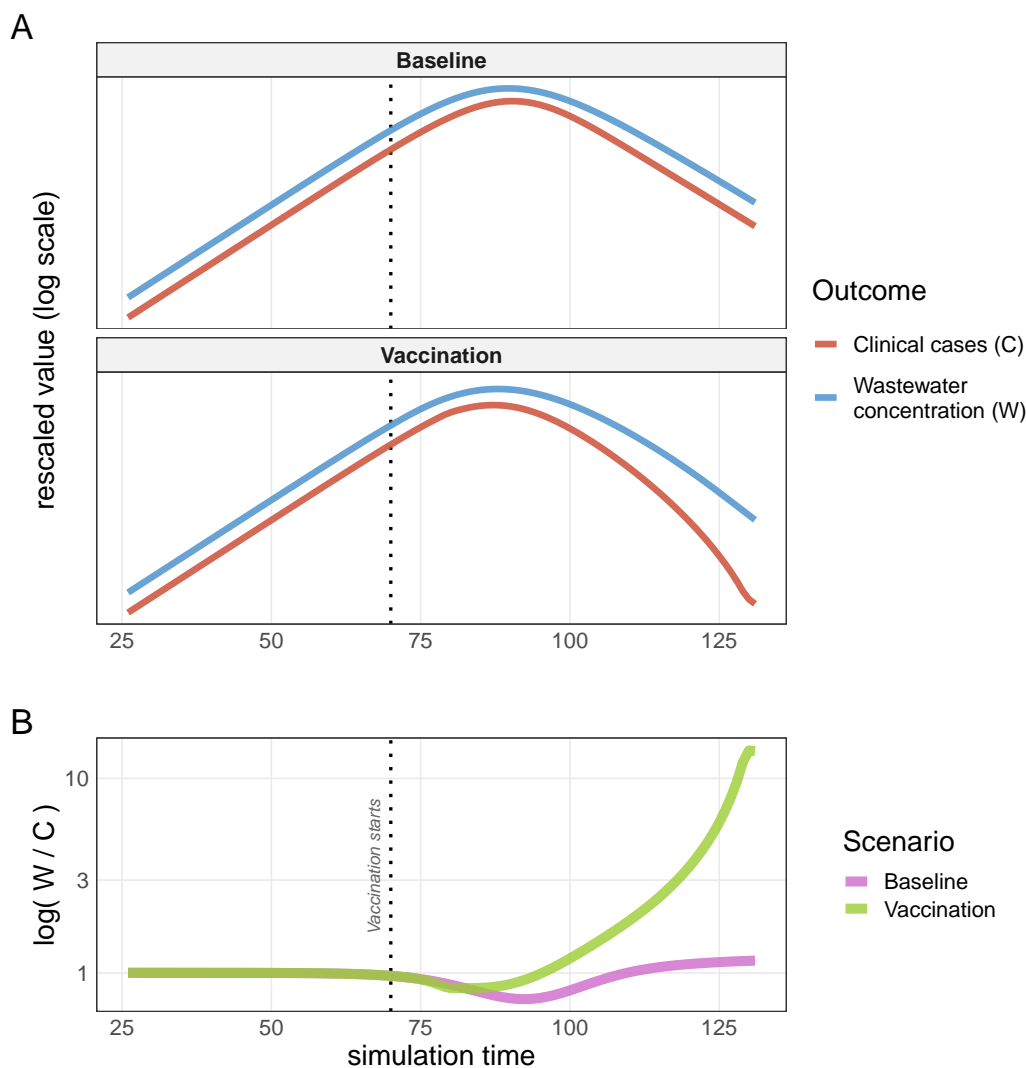

Figure 8: Infection-permissive vaccination. Panel A shows the trajectories of reported clinical cases and SARS-CoV-2 concentration in wastewater under a scenario using an infection-permissive vaccine (“Vaccination”), or not (“Baseline”). In the vaccination scenario, the reported clinical cases decrease more rapidly than the level of SARS-CoV-2 in wastewater because sub-clinical infections tend to be less reported whereas faecal shedding continues. Panel B highlights this difference showing  $W(t)/C(t)$ , the ratio of reported wastewater concentration over reported cases, for the baseline / no-vaccination (pink) and the vaccination (green) scenarios. The ratio is normalized to have a starting value at 1 to make it easier to quantify the increase visually. The vertical dotted line indicates when vaccination starts (at time 70).

## Wastewater-Based Epidemic Modelling

---

lic health metrics, if they are available to public health in a timely manner. In addition,  
452 the ability to triangulate the state of an epidemic using alternative data sources helps en-  
sure additional confidence in the estimation of relevant parameters or forecasting. Indeed,  
454 the COVID-19 pandemic has consumed public-health resources at levels that are probably  
not sustainable for long-term surveillance of this pathogen. However, the current wastew-  
456 ater surveillance performed in many communities can probably be continued as long as  
necessary given its relative low cost [9].

458 Our modelling framework provides a more principled alternative to simpler smoothing tech-  
niques (*e.g.*, moving averages, polynomial interpolations) that have been used to support  
460 the interpretation of WBS [28]. However, we note that less complex modelling options  
are possible if the focus is on specific epidemiological metrics ([62, 63]). We also note  
462 recent efforts to use machine learning techniques and artificial neural network that incor-  
porate WBS [64]. While those methods are promising, they cannot—by design—explain the  
464 epidemiological mechanisms at play.

Our model enables *in silico* experiments on the epidemic/wastewater system to identify  
466 key parameters and processes that can play an important role for the epidemiological inter-  
pretation. We showed, using simulations, that the relative timing of the wastewater signal  
468 (whether it is leading or not) compared to traditional clinical surveillance is actually influ-  
enced by the characteristics of *both* systems (Figure 6). On the one hand, the laboratory  
470 analysis of wastewater samples may not detect the presence of SARS-CoV-2 because, for  
example, its limit of detection is too high, or prevalence of infection in the community is  
472 very small, or the viral RNA has degraded before reaching the sampling site. Shipment  
time of wastewater samples can also be significant (*e.g.*, several days) for remote sampling  
474 locations without any laboratory capacity. On the other hand, the delay in clinical cases  
reports is usually caused by the incubation period and the reporting time of an infection  
476 by the health system (turnaround time for contact tracing and/or laboratory results of in-  
dividuals' swab) or availability of testing. Some communities would typically have a longer  
478 lag for clinical reporting than for wastewater surveillance [20, 22, 28, 24], while others may  
have the opposite (for example when a very effective contact tracing system is in place  
480 [65] or rapid testing is implemented). Moreover, a community may experience both situa-  
tions, that is a period when clinical surveillance is extremely efficient at detecting cases so  
482 rapidly that it leads wastewater surveillance while, at other times, it can lag (for example  
when incidence is high, overwhelming contact-tracing and clinical testing capacities). The  
484 model presented here allows to quantify how various factors can impacts the relative timing  
between clinical and wastewater surveillances.

486 It can be tempting to monitor the effect of public health interventions using changes in the  
levels of SARS-CoV-2 in wastewater given its non-invasive nature. Indeed, WBS should  
488 be less affected by sampling bias than clinical surveillance (for example the latter may  
miss most of the subclinical infections). However, our simulations showed that wastewater

## Wastewater-Based Epidemic Modelling

---

490 surveillance may be inferior to clinical surveillance to identify sharp declines in transmis-  
492 sion, as typically seen after a lockdown is implemented (Figure 7). The long period of  
faecal shedding creates a lag in comparison to the sudden drop of incidence caused by the  
public health intervention, inhibiting a prompt signal in wastewater. This effect is visible  
494 on the Canadian data sets presented here (Figure 2).

We also highlight the potential for an infection-permissive vaccine to generate discordant  
496 signals between wastewater and clinical surveillances (Figure 8). Indeed, vaccination im-  
plies a larger proportion of asymptomatic infections which are less likely to be detected by  
498 clinical surveillance, but still picked up in wastewater because of continued faecal shedding.  
Note that we use our model to highlight this potential effect, whereas detecting it in real  
500 data is probably challenging without studies purposely designed to detect this.

Here, we used a mixed approach regarding the normalization of the levels of SARS-CoV-  
502 2 in wastewater, with Ottawa using PMMV-normalization versus TSS-normalization for  
Toronto and Edmonton. It is likely that some normalization is necessary to discount the  
504 variations of the total faecal mass shedded and viral degradation, but it is still not clear  
which normalization is the most appropriate for a given sewershed. We note that we  
506 considered separately each WWTP in Toronto to provide examples of application at the  
sub-municipal level.

508 Our modelling approach has several weaknesses. We did not precisely model the transport  
and fate of SARS-CoV-2 in municipal sewer systems. The lack of data about flow dynamics  
510 and particles binding of SARS-CoV-2 in wastewater hampered a more detailed approach.  
Hence, we took a simple approach to model the below-ground component and assumed the  
512 flow dynamic followed a low-dispersion plug flow model with a plausible fixed decay rate  
[46] and varied the mean transit time (from shedding to sampling sites) within a range of  
514 possible values. As more research focuses on the fate of SARS-CoV-2 in wastewater, the  
transport module of our model can be enhanced.

516 The comparison with observed seroprevalence level must be done with caution, because we  
do not model seroreversion (patients who were infected but subsequently test seronegative  
518 because of loss of immunity or antibodies falling to undetectable levels). Our model does  
not model vaccination explicitly. We made this choice to keep the first version of our  
520 model relatively simple. However, we believe that we can appropriately approximate the  
effects of infection-permissive vaccination by reducing the transmission rate and increasing  
522 the proportion of asymptomatic infections. As the proportion of vaccinated individuals  
increases, modelling an explicit vaccination process is necessary. We note that for the  
524 Canadian cities studied here, the vaccination coverage was either null or low during the  
study period.

526 We model SARS-CoV-2 as a single-strain pathogen which is an oversimplification of reality,  
given the numerous variants circulating in Canada since late 2020 [66]. However, it is not  
528 clear how (or if) multi-variants modelling would affect our results, given that the difference  
of viral shedding (respiratory and faecal) between variants is still not fully understood

## Wastewater-Based Epidemic Modelling

---

530 [67, 68].

532 Because of ordinary differential equations, this model is not well adapted to either small  
533 communities or very low prevalence settings. While its epidemiological structure (Figure 1)  
534 would still be valid for such environments, a more advanced statistical modelling would be  
535 preferable to handle low incidence counts and observation uncertainty [69, 70].

536 A further limitation of our model is the use of a scaling coefficient for the amount of SARS-  
537 CoV-2 shedded in the wastewater by the infected population (parameter  $\omega$  in Equation 3).  
538 This scaling coefficient embeds all the uncertainties associated with sampling strategy and  
539 laboratory analysis, such as assay recovery efficiency, limit of detection, and total faecal  
540 mass normalization. Most of those processes are currently poorly known for SARS-CoV-2  
541 and, as long as more observational data is not available, will constrain modelling (note  
542 that this limitation has already been identified for polio models [14]). An ultimate goal  
543 of wastewater surveillance may be to measure all the components of the scaling coefficient  
544 (here,  $\omega$ ) in order to estimate infection prevalence in a community directly from viral  
545 concentration readings.

To conclude, the model presented here—built upon previous similar approach for other  
546 pathogens [71, 14, 72]—is a first step to better understand the mechanistic relationships  
547 between the COVID-19 epidemic spreading in a community and the SARS-CoV-2 RNA  
548 concentration in wastewater caused by faecal shedding of infected individuals (and poten-  
549 tially from urinary or sputum shedding). Future developments should explicitly incorporate  
550 vaccination and multiple variants/strains given the ability of new assays to detect variants  
551 from wastewater samples [73, 74, 75]. This model can be the basis of quantitative tools  
552 to support public health decision making that embraces wastewater-based epidemiology.  
553 Beyond the SARS-CoV-2/COVID-19 pandemic, WBS coupled with the type of model pre-  
554 sented here could be leveraged and applied to other transmissible pathogens where urinary  
555 or faecal shedding occurs, such as other respiratory diseases (*e.g.*, influenza, respiratory  
556 syncytial virus, adenovirus) and some enteric diseases (*e.g.*, norovirus, rotavirus, shigel-  
557 losis).



## 558 **6 Acknowledgments**

- 560 • Wastewater samples from Edmonton and Toronto were provided to the NML through a collaboration with Statistics Canada's Canadian Wastewater Survey
- 562 • Dave Spreitzer, Ravinder Lidder, Codey Dueck, Quinn Wonitowy, Umar Mohammed and Graham Cox for their contribution in wastewater sample processing and technical assistance.
- 564 • Dana Al-Bargash provided data and local expertise for the City of Toronto.
- 566 • The wastewater treatment plant Gold Bar, EPCOR Water Services Inc., Edmonton, Alberta, Canada for providing sewage samples in this study for the city of Edmonton.
- 568 • Peter Vanrolleghen's group at the University of Laval (QC, Canada) for insightful discussions on viral transport and fate in wastewater

## **7 Funding**

570 Robert Delatolla acknowledges funding by Ontario Ministry of Environment Conserva-  
572 tion and Parks Wastewater Surveillance Initiative Transfer Payment Agreement 2020-11-1-1463261970.

## **8 Competing interests**

574 All authors declare they do not have any competing interests.

## Wastewater-Based Epidemic Modelling

---

### 9 Tables

Table 1: Description of the model's compartments and parameters for the SARS-CoV-2 RNA transmission and disease outcome.

| Symbole         | Definition                                                                           |
|-----------------|--------------------------------------------------------------------------------------|
| $S$             | susceptibles                                                                         |
| $E$             | exposed susceptibles but not infectious                                              |
| $A_k$           | asymptomatic infectious cases in $k^{th}$ subcompartment                             |
| $I_k$           | symptomatic infectious cases in $k^{th}$ subcompartment                              |
| $J_k$           | symptomatic infectious cases in $k^{th}$ subcompartment who later admits to hospital |
| $Z_k$           | non-infectious cases but fecal shedding SARS-CoV-2 RNA in $k^{th}$ subcompartment    |
| $H$             | hospitalized patients                                                                |
| $R$             | recovered cases                                                                      |
| $D$             | deceased cases                                                                       |
| $\beta_{I,k}$   | transmission rate in $k^{th}$ subcompartment among symptomatics (per contact)        |
| $\beta_{A,k}$   | transmission rate in $k^{th}$ subcompartment among asymptomatics (per contact)       |
| $1/\varepsilon$ | ave. latency time (days)                                                             |
| $1/\nu_k$       | ave. duration in $k^{th}$ subcompartment among symptomatics (days)                   |
| $1/\mu_k$       | ave. duration in $k^{th}$ subcompartment among symptomatics goes to hospital (days)  |
| $1/\theta_k$    | ave. duration in $k^{th}$ subcompartment among asymptomatics (days)                  |
| $1/\eta_k$      | ave. duration in $k^{th}$ subcompartment of shedding after infectiousness (days)     |
| $1/\ell$        | ave. length of stay in a hospital (days)                                             |
| $n_I$           | total number of subcompartments in $I$ state                                         |
| $n_J$           | total number of subcompartments in $J$ state                                         |
| $n_A$           | total number of subcompartments in $A$ state                                         |
| $n_Z$           | total number of subcompartments in $Z$ state                                         |
| $\alpha$        | proportion of exposed cases that are asymptomatic                                    |
| $h$             | proportion of symptomatic cases that need hospital admission                         |
| $\delta$        | proportion of deceased individuals among hospitalized patients                       |

Table 2: Description of fixed parameters used in this model and their sources

| symbol       | description                                                                     | value | unit | source                                                                                                                                                                                                                                    |
|--------------|---------------------------------------------------------------------------------|-------|------|-------------------------------------------------------------------------------------------------------------------------------------------------------------------------------------------------------------------------------------------|
| $\xi$        | relative infectiousness of asymptomatic compared to symptomatic states          | 0.8   | none | [76, 77, 78, 79, 80, 81]                                                                                                                                                                                                                  |
| $1/\epsilon$ | Latent mean duration                                                            | 2     | day  | [45, 44]                                                                                                                                                                                                                                  |
| $1/\nu$      | Infectiousness duration for symptomatic individual                              | 12    | day  | [82, 83, 84, 85]                                                                                                                                                                                                                          |
| $1/\mu$      | Infectiousness duration for symptomatic individual before admission to hospital | 8     | day  | [86, 44]                                                                                                                                                                                                                                  |
| $1/\theta$   | Infectiousness duration for asymptomatic individual                             | 10    | day  | [82, 83, 84, 85]                                                                                                                                                                                                                          |
| $1/\eta$     | fecal shedding duration after infectious period                                 | 24    | day  | [87]                                                                                                                                                                                                                                      |
| $1/\ell$     | Length of hospital stay                                                         | 10    | day  | assumed                                                                                                                                                                                                                                   |
| $\alpha$     | asymptomatic proportion                                                         | 0.316 | none | [88, 89, 90]                                                                                                                                                                                                                              |
| $\delta$     | proportion of death from hospitalized                                           | 0.19  | none | Report of Canadian Institute for Health Information <a href="https://www.cihi.ca/en/covid-19-hospitalization-and-emergency-department-statistics">https://www.cihi.ca/en/covid-19-hospitalization-and-emergency-department-statistics</a> |
| $\ell_{ww}$  | reporting lag between sampling date and reporting date in days                  | 2     | day  | assumed                                                                                                                                                                                                                                   |
| $\kappa$     | decay rate of RNA in ww                                                         | 0.18  | none | [46]                                                                                                                                                                                                                                      |
| $\tau$       | mean transit time between shedding and sampling sites (in days)                 | 1     | day  | assumed                                                                                                                                                                                                                                   |
| $\sigma$     | std dev transit time between shedding and sampling sites (in days)              | 0.3   | day  | assumed                                                                                                                                                                                                                                   |

## Wastewater-Based Epidemic Modelling

---

### 576 References

- 578 [1] Lizhou Feng, Wei Zhang, and Xiqing Li. Monitoring of regional drug abuse through wastewater-based epidemiology? A critical review (article). *Science China Earth Sciences*, 61(3):239–255, 2018.
- 580 [2] E. Zuccato, C. Chiabrando, S. Castiglioni, R. Bagnati, and R. Fanelli. Estimating community drug abuse by wastewater analysis. *Environ Health Perspect*, 116(8):1027–1032, Aug 2008.
- 582 [3] E. Zuccato, C. Chiabrando, S. Castiglioni, D. Calamari, R. Bagnati, S. Schiarea, and R. Fanelli. Cocaine in surface waters: a new evidence-based tool to monitor community drug abuse. *Environ Health*, 4:14, Aug 2005.
- 584 [4] A. Christou, A. Aguera, J. M. Bayona, E. Cytryn, V. Fotopoulos, D. Lambropoulou, C. M. Manaia, C. Michael, M. Revitt, P. Schröder, and D. Fatta-Kassinou. The potential implications of reclaimed wastewater reuse for irrigation on the agricultural environment: The knowns and unknowns of the fate of antibiotics and antibiotic resistant bacteria and resistance genes - A review. *Water Res*, 123:448–467, 10 2017.
- 588 [5] L. Rizzo, C. Manaia, C. Merlin, T. Schwartz, C. Dagot, M. C. Ploy, I. Michael, and D. Fatta-Kassinou. Urban wastewater treatment plants as hotspots for antibiotic resistant bacteria and genes spread into the environment: a review. *Sci Total Environ*, 447:345–360, Mar 2013.
- 590 [6] M. Laht, A. Karkman, V. Voolaid, C. Ritz, T. Tenson, M. Virta, and V. Kisand. Abundances of tetracycline, sulphonamide and beta-lactam antibiotic resistance genes in conventional wastewater treatment plants (WWTPs) with different waste load. *PLoS One*, 9(8):e103705, 2014.
- 592 [7] N. I. Rousis, E. Zuccato, and S. Castiglioni. Wastewater-based epidemiology to assess human exposure to pyrethroid pesticides. *Environ Int*, 99:213–220, Feb 2017.
- 594 [8] N. I. Rousis, E. Zuccato, and S. Castiglioni. Monitoring population exposure to pesticides based on liquid chromatography-tandem mass spectrometry measurement of their urinary metabolites in urban wastewater: A novel biomonitoring approach. *Sci Total Environ*, 571:1349–1357, Nov 2016.
- 598 [9] BM Gawlik, i S Tavazz, G Mariani, H Skejo, M Sponar, T Higgins, G Medema, and T Wintgens. Sars-cov-2 surveillance employing sewage. towards a sentinel system. Technical report, European Union, 2021.
- 600 [10] J. H. Lun, J. Hewitt, A. Sitabkhan, J. S. Eden, D. Enosi Tuipulotu, N. E. Netzler, L. Morrell, J. Merif, R. Jones, B. Huang, D. Warrilow, K. A. Ressler, M. J. Ferson, D. E. Dwyer, J. Kok, W. D. Rawlinson, D. Deere, N. D. Crosbie, and P. A. White. Emerging recombinant noroviruses identified by clinical and waste water screening. *Emerg Microbes Infect*, 7(1):50, Mar 2018.
- 602 [11] J. M. Fioretti, T. M. Fumian, M. S. Rocha, I. A. L. Dos Santos, F. A. Carvalho-Costa, M. R. de Assis, J. S. Rodrigues, J. P. G. Leite, and M. P. Miagostovich. Surveillance of Noroviruses in Rio De Janeiro, Brazil: Occurrence of New GIV Genotype in Clinical and Wastewater Samples. *Food Environ Virol*, 10(1):1–6, 03 2018.
- 604 [12] H. Asghar, O. M. Diop, G. Weldegebriel, F. Malik, S. Shetty, L. El Bassioni, A. O. Akande, E. Al Maamoun, S. Zaidi, A. J. Adeniji, C. C. Burns, J. Deshpande, M. S. Oberste, and S. A. Lowther. Environmental surveillance for polioviruses in the Global Polio Eradication Initiative. *J Infect Dis*, 210 Suppl 1:294–303, Nov 2014.
- 606 [13] R. J. Duintjer Tebbens, M. Zimmermann, M. A. Pallansch, and K. M. Thompson. Insights from a Systematic Search for Information on Designs, Costs, and Effectiveness of Poliovirus Environmental Surveillance Systems. *Food Environ Virol*, 9(4):361–382, 12 2017.
- 608 [14] Andrew F. Brouwer, Joseph N. S. Eisenberg, Connor D. Pomeroy, Lester M. Shulman, Musa Hindiyeh, Yossi Manor, Itamar Grotto, James S. Koopman, and Marisa C. Eisenberg. Epidemiology of the silent polio outbreak in rahat, israel, based on modeling of environmental surveillance data. *Proceedings of the National Academy of Sciences*, 115(45):E10625–E10633, 2018.
- 610 [15] C.C. Naughton. COVIDPoops19 Summary of Global SARS-CoV-2 Wastewater Monitoring Efforts by UC Merced Researchers. *ArcGIS Online Dashboard*, 2020.
- 612
- 614
- 616
- 618
- 620

## Wastewater-Based Epidemic Modelling

---

- 622 [16] Gertjan Medema, Leo Heijnen, Goffe Elsinga, Ronald Italiaander, and Anke Brouwer. Presence of sars-  
coronavirus-2 rna in sewage and correlation with reported covid-19 prevalence in the early stage of the epidemic  
in the netherlands. *Environmental Science & Technology Letters*, 7(7):511–516, 2020.
- 624 [17] W. Ahmed, N. Angel, J. Edson, K. Bibby, A. Bivins, J. W. O'Brien, P. M. Choi, M. Kitajima, S. L. Simpson,  
626 J. Li, B. Tschärke, R. Verhagen, W. J. M. Smith, J. Zaugg, L. Dierens, P. Hugenholtz, K. V. Thomas, and  
J. F. Mueller. First confirmed detection of SARS-CoV-2 in untreated wastewater in Australia: A proof of  
628 concept for the wastewater surveillance of COVID-19 in the community. *Sci Total Environ*, 728:138764, Aug  
2020.
- [18] S. Wurtzer, V. Marechal, J. M. Mouchel, Y. Maday, R. Teyssou, E. Richard, J. L. Almayrac, and L. Moulin.  
630 Evaluation of lockdown effect on SARS-CoV-2 dynamics through viral genome quantification in waste water,  
Greater Paris, France, 5 March to 23 April 2020. *Euro Surveill*, 25(50), 12 2020.
- 632 [19] J. Peccia, A. Zulli, D. E. Brackney, N. D. Grubaugh, E. H. Kaplan, A. Casanovas-Massana, A. I. Ko, A. A.  
634 Malik, D. Wang, M. Wang, J. L. Warren, D. M. Weinberger, W. Arnold, and S. B. Omer. Measurement of  
SARS-CoV-2 RNA in wastewater tracks community infection dynamics. *Nat Biotechnol*, 38(10):1164–1167, 10  
2020.
- 636 [20] G. La Rosa, M. Iaconelli, P. Mancini, G. Bonanno Ferraro, C. Veneri, L. Bonadonna, L. Lucentini, and  
638 E. Suffredini. First detection of SARS-CoV-2 in untreated wastewaters in Italy. *Sci Total Environ*, 736:139652,  
Sep 2020.
- [21] D. A. Larsen and K. R. Wigginton. Tracking COVID-19 with wastewater. *Nat Biotechnol*, 38(10):1151–1153,  
640 10 2020.
- [22] W. Randazzo, P. Truchado, E. Cuevas-Ferrando, P. Simon, A. Allende, and G. Sanchez. SARS-CoV-2 RNA  
642 in wastewater anticipated COVID-19 occurrence in a low prevalence area. *Water Res*, 181:115942, Aug 2020.
- [23] P. M. D'Aoust, E. Mercier, D. Montpetit, J. J. Jia, I. Alexandrov, N. Neault, A. T. Baig, J. Mayne, X. Zhang,  
644 T. Alain, M. A. Langlois, M. R. Servos, M. MacKenzie, D. Figeys, A. E. MacKenzie, T. E. Graber, and  
R. Delatolla. Quantitative analysis of SARS-CoV-2 RNA from wastewater solids in communities with low  
646 COVID-19 incidence and prevalence. *Water Res*, 188:116560, Jan 2021.
- [24] A. Hata, H. Hara-Yamamura, Y. Meuchi, S. Imai, and R. Honda. Detection of SARS-CoV-2 in wastewater in  
648 Japan during a COVID-19 outbreak. *Sci Total Environ*, 758:143578, Mar 2021.
- [25] C. Gibas, K. Lambirth, N. Mittal, M. A. I. Juel, V. B. Barua, L. Roppolo Brazell, K. Hinton, J. Lontai,  
650 N. Stark, I. Young, C. Quach, M. Russ, J. Kauer, B. Nicolosi, D. Chen, S. Akella, W. Tang, J. Schlueter,  
and M. Munir. Implementing building-level SARS-CoV-2 wastewater surveillance on a university campus. *Sci  
652 Total Environ*, 782:146749, Aug 2021.
- [26] Jaclyn Peiser. University of Arizona used wastewater testing to detect cases of coronavirus in a dorm. *The  
654 Washington Post*, Aug 2020.
- [27] Denise Paglinawan. University of Guelph testing campus residences' wastewater to detect COVID-19. *CBC  
656 News - The Canadian Press*, Oct 2020.
- [28] P. M. D'Aoust, T. E. Graber, E. Mercier, D. Montpetit, I. Alexandrov, N. Neault, A. T. Baig, J. Mayne,  
658 X. Zhang, T. Alain, M. R. Servos, N. Srikanthan, M. MacKenzie, D. Figeys, D. Manuel, P. Juni, A. E.  
MacKenzie, and R. Delatolla. Sci Total Environ Catching a resurgence: Increase in SARS-CoV-2 viral RNA  
660 identified in wastewater 48 h before COVID-19 clinical tests and 96 h before hospitalizations. *Sci Total Environ*,  
770:145319, May 2021.
- 662 [29] National Institute for Public Health Netherlands, Welfare the Environment, Ministry of Health, and Sport.  
Coronavirus monitoring in sewage research. *Amsterdam: National Institute for Public Health and the Envi-  
664 ronment*, Mar 2021.
- [30] Public Health Ottawa. Wastewater COVID-19 surveillance. *Ottawa Public Health, Ontario, Canada*, 2021.
- 666 [31] Public Health Ontario. Ontario Agency for Health Protection and Promotion, Wastewater surveillance of  
COVID-19, Toronto, ON. *Queen's Printer for Ontario*, Apr 2021.

## Wastewater-Based Epidemic Modelling

---

- 668 [32] WHO. World Health Organization, Status of environmental surveillance for SARS-CoV-2 virus: scientific brief. *World Health Organization*, 2020.
- 670 [33] Paola Foladori, Francesca Cutrupi, Nicola Segata, Serena Manara, Federica Pinto, Francesca Malpei, Laura  
672 Bruni, and Giuseppina La Rosa. Sars-cov-2 from faeces to wastewater treatment: What do we know? a review. *Science of The Total Environment*, 743:140444, 2020.
- [34] X. Li, S. Zhang, J. Shi, S. P. Luby, and G. Jiang. Uncertainties in estimating SARS-CoV-2 prevalence by  
674 wastewater-based epidemiology. *Chem Eng J*, 415:129039, Jul 2021.
- [35] Y. Zhu, W. Oishi, C. Maruo, M. Saito, R. Chen, M. Kitajima, and D. Sano. Early warning of COVID-19 via  
676 wastewater-based epidemiology: potential and bottlenecks. *Sci Total Environ*, 767:145124, May 2021.
- [36] Mia Rabson. Researchers looking for clues to the COVID-19 pandemic in city sewers. *Global News, The  
678 Canadian Press*, Apr 2021.
- [37] David L. Jones, Marcos Quintela Baluja, David W. Graham, Alexander Corbishley, James E. McDonald,  
680 Shelagh K. Malham, Luke S. Hillary, Thomas R. Connor, William H. Gaze, Ines B. Moura, Mark H. Wilcox, and  
682 Kata Farkas. Shedding of sars-cov-2 in feces and urine and its potential role in person-to-person transmission  
and the environment-based spread of covid-19. *Science of The Total Environment*, 749:141364, 2020.
- [38] Kun Wang, Xin Zhang, Jiaying Sun, Jia Ye, Feilong Wang, Jing Hua, Huayu Zhang, Ting Shi, Qiang Li, and  
684 Xiaodong Wu. Differences of severe acute respiratory syndrome coronavirus 2 shedding duration in sputum and  
686 nasopharyngeal swab specimens among adult inpatients with coronavirus disease 2019. *Chest*, 158(5):1876–  
1884, 2020.
- [39] P. M. Gundy, C. P. Gerba, and I. L. Pepper. Survival of Coronaviruses in Water and Wastewater. *Food Environ  
688 Virol*, 2009.
- [40] M. Kitajima, W. Ahmed, K. Bibby, A. Carducci, C. P. Gerba, K. A. Hamilton, E. Haramoto, and J. B. Rose.  
690 Sci Total Environ SARS-CoV-2 in wastewater: State of the knowledge and research needs. *Sci Total Environ*,  
739:139076, Oct 2020.
- [41] I. Michael-Kordatou, P. Karaolia, and D. Fatta-Kassinos. J Environ Chem Eng Sewage analysis as a tool for  
692 the COVID-19 pandemic response and management: the urgent need for optimised protocols for SARS-CoV-2  
694 detection and quantification. *J Environ Chem Eng*, 8(5):104306, Oct 2020.
- [42] Roy M Anderson and Robert M May. *Infectious Diseases of Humans - Dynamics and Control*. Oxford  
696 University Press, 1991.
- [43] Helen J Wearing, Pejman Rohani, and Matt J Keeling. Appropriate models for the management of infectious  
698 diseases. *PLoS Medicine*, 2(7):e174, 2005.
- [44] X. He, E. H. Y. Lau, P. Wu, X. Deng, J. Wang, X. Hao, Y. C. Lau, J. Y. Wong, Y. Guan, X. Tan, X. Mo,  
700 Y. Chen, B. Liao, W. Chen, F. Hu, Q. Zhang, M. Zhong, Y. Wu, L. Zhao, F. Zhang, B. J. Cowling, F. Li, and  
702 G. M. Leung. Temporal dynamics in viral shedding and transmissibility of COVID-19. *Nat Med*, 26(5):672–675,  
05 2020.
- [45] Q. Li, X. Guan, P. Wu, X. Wang, L. Zhou, Y. Tong, R. Ren, K. S. M. Leung, E. H. Y. Lau, J. Y. Wong,  
704 X. Xing, N. Xiang, Y. Wu, C. Li, Q. Chen, D. Li, T. Liu, J. Zhao, M. Liu, W. Tu, C. Chen, L. Jin, R. Yang,  
706 Q. Wang, S. Zhou, R. Wang, H. Liu, Y. Luo, Y. Liu, G. Shao, H. Li, Z. Tao, Y. Yang, Z. Deng, B. Liu, Z. Ma,  
708 Y. Zhang, G. Shi, T. T. Y. Lam, J. T. Wu, G. F. Gao, B. J. Cowling, B. Yang, G. M. Leung, and Z. Feng.  
Early Transmission Dynamics in Wuhan, China, of Novel Coronavirus-Infected Pneumonia. *N Engl J Med*,  
382(13):1199–1207, 03 2020.
- [46] Warish Ahmed, Paul M. Bertsch, Kyle Bibby, Eiji Haramoto, Joanne Hewitt, Flavia Huygens, Pradip Gyawali,  
710 Asja Korajkic, Shane Riddell, Samendra P. Sherchan, Stuart L. Simpson, Kwanrawee Sirikanchana, Erin M.  
712 Symonds, Rory Verhagen, Seshadri S. Vasan, Masaaki Kitajima, and Aaron Bivins. Decay of sars-cov-2  
and surrogate murine hepatitis virus rna in untreated wastewater to inform application in wastewater-based  
epidemiology. *Environmental Research*, 191:110092, 2020.
- [47] A. Kayode Coker. Chapter eight - residence time distributions in flow reactors. pages 663–761, 2001.
-

## Wastewater-Based Epidemic Modelling

---

- 716 [48] City of Ottawa. Wastewater collection and treatment, Robert O. Pickard Environmental Centre (ROPEC).  
718 *Online*, 2021.
- [49] Toronto Water. City of Toronto, Ashbridges Bay wastewater treatment plant annual report of 2020. *Online*,  
720 2021.
- [50] Toronto Water. City of Toronto, Humber wastewater treatment plant annual report of 2020. *Online*, 2021.
- [51] Toronto Water. City of Toronto, Highland Creek wastewater treatment plant annual report of 2020. *Online*,  
722 2021.
- [52] Statistics Canada. 2016 Census of Canada via Toronto Public Health. 2016.
- [53] Canadian Blood Services. Covid-19 public seroprevalence report: April 2020 to January 2021. Technical report,  
724 Canadian Blood Services, 2021.
- [54] Mark A Beaumont, Wenyang Zhang, and David J Balding. Approximate Bayesian Computation in Population  
726 *Genetics*. *Genetics*, 162(4):2025–2035, 12 2002.
- [55] C. Hollingsworth D. Keeling M. Vegvari C. Baggaley R. Maddren R. Anderson, R. Donnelly. Reproduction  
728 number (R) and growth rate (r) of the COVID-19 epidemic in the UK: methods of estimation, data sources,  
causes of heterogeneity, and use as a guide in policy formulation. *The Royal Society*, 2020.
- [56] J. M. Brauner, S. Mindermann, M. Sharma, D. Johnston, J. Salvatier, T. Gaven?iak, A. B. Stephenson,  
730 G. Leech, G. Altman, V. Mikulik, A. J. Norman, J. T. Monrad, T. Besiroglu, H. Ge, M. A. Hartwick, Y. W.  
732 Teh, L. Chindelevitch, Y. Gal, and J. Kulveit. ScienceInferring the effectiveness of government interventions  
against COVID-19. *Science*, 371(6531), 02 2021.
- [57] A Cori, N M Ferguson, C. Fraser, and S Cauchemez. A New Framework and Software to Estimate Time-  
734 Varying Reproduction Numbers During Epidemics. *American Journal of Epidemiology*, 178(9):1505–1512,  
736 October 2013.
- [58] Brian M Pecson, Emily Darby, Charles N Haas, Yamrot M Amha, Mitchel Bartolo, Richard Danielson, Yeggie  
738 Dearborn, George Di Giovanni, Christobel Ferguson, Stephanie Fevig, et al. Reproducibility and sensitivity  
of 36 methods to quantify the sars-cov-2 genetic signal in raw wastewater: findings from an interlaboratory  
740 methods evaluation in the us. *Environmental Science: Water Research & Technology*, 7(3):504–520, 2021.
- [59] Aaron Bivins, Justin Greaves, Robert Fischer, Kwe Claude Yinda, Warish Ahmed, Masaaki Kitajima, Vin-  
742 cent J. Munster, and Kyle Bibby. Persistence of sars-cov-2 in water and wastewater. *Environmental Science  
& Technology Letters*, 7(12):937–942, 2020.
- [60] P. Mandal, A. K. Gupta, and B. K. Dubey. A review on presence, survival, disinfection/removal methods of  
744 coronavirus in wastewater and progress of wastewater-based epidemiology. *J Environ Chem Eng*, 8(5):104317,  
746 Oct 2020.
- [61] N. Sims and B. Kasprzyk-Hordern. Environ IntFuture perspectives of wastewater-based epidemiology: Moni-  
748 toring infectious disease spread and resistance to the community level. *Environ Int*, 139:105689, 06 2020.
- [62] Jana S. Huisman, Jérémie Scire, Lea Caduff, Xavier Fernandez-Cassi, Pravin Ganesanandamoorthy, Anina  
750 Kull, Andreas Scheidegger, Elyse Stachler, Alexandria B. Boehm, Bridgette Hughes, Alisha Knudson, Aaron  
Topol, Krista R. Wigginton, Marlene K. Wolfe, Tamar Kohn, Christoph Ort, Tanja Stadler, and Timothy R.  
752 Julian. Wastewater-based estimation of the effective reproductive number of sars-cov-2. *medRxiv*, 2021.
- [63] A. Xiao, F. Wu, M. Bushman, J. Zhang, M. Imakaev, P. R. Chai, C. Duvallet, N. Endo, T. B. Erickson,  
754 F. Armas, B. Arnold, H. Chen, F. Chandra, N. Ghaeli, X. Gu, W. P. Hanage, W. L. Lee, M. Matus, K. A.  
McElroy, K. Moniz, S. F. Rhode, J. Thompson, and E. J. Alm. medRxivMetrics to relate COVID-19 wastewater  
756 data to clinical testing dynamics. *medRxiv*, Jun 2021.
- [64] X. Li, J. Kulandaivelu, S. Zhang, J. Shi, M. Sivakumar, J. Mueller, S. Luby, W. Ahmed, L. Coin, and  
758 G. Jiang. Sci Total EnvironData-driven estimation of COVID-19 community prevalence through wastewater-  
based epidemiology. *Sci Total Environ*, 789:147947, May 2021.

## Wastewater-Based Epidemic Modelling

---

- 760 [65] Sofia K. Mettler, Jihoo Kim, and Marloes H. Maathuis. Diagnostic serial interval as a novel indicator for  
762 contact tracing effectiveness exemplified with the sars-cov-2/covid-19 outbreak in south korea. *International  
Journal of Infectious Diseases*, 99:346–351, 2020.
- [66] Angela McLaughlin, Vincent Montoya, Rachel L. Miller, Gideon J. Mordecai, Michael Worobey, Art F. Y.  
764 Poon, and Jeffrey B. Joy. Early and ongoing importations of sars-cov-2 in canada. *medRxiv*, 2021.
- [67] Michael Kidd, Alex Richter, Angus Best, Nicola Cumley, Jeremy Mirza, Benita Percival, Megan Mayhew,  
766 Oliver Megram, Fiona Ashford, Thomas White, Emma Moles-Garcia, Liam Crawford, Andrew Bosworth,  
768 Sowsan F Atabani, Tim Plant, and Alan McNally. S-Variant SARS-CoV-2 Lineage B.1.1.7 Is Associated With  
Significantly Higher Viral Load in Samples Tested by TaqPath Polymerase Chain Reaction. *The Journal of  
Infectious Diseases*, 223(10):1666–1670, 02 2021.
- [68] Stephen M. Kissler, Joseph R. Fauver, Christina Mack, Caroline G. Tai, Mallery I. Breban, Anne E. Watkins,  
770 Radhika M. Samant, Deverick J. Anderson, David D. Ho, Jessica Metti, Gaurav Khullar, Rachel Baits,  
772 Matthew MacKay, Daisy Salgado, Tim Baker, Joel T. Dudley, Christopher E. Mason, Nathan D. Grubaugh,  
774 and Yonatan H. Grad. Densely sampled viral trajectories for sars-cov-2 variants alpha (b.1.1.7) and epsilon  
(b.1.429). *medRxiv*, 2021.
- [69] A A King, M Domenech de Celles, F M G Magpantay, and P. Rohani. Avoidable errors in the modelling  
776 of outbreaks of emerging pathogens, with special reference to Ebola. *Proceedings of the Royal Society B:  
Biological Sciences*, 282(1806):20150347–20150347, April 2015.
- [70] Michael Li, Jonathan Dushoff, and Benjamin M Bolker. Fitting mechanistic epidemic models to data: A com-  
778 parison of simple Markov chain Monte Carlo approaches. *Statistical Methods in Medical Research*, 27(7):1956–  
780 1967, 2018.
- [71] C. S. McMahan, S. Self, L. Rennert, C. Kalbaugh, D. Kriebel, D. Graves, J. A. Deaver, S. Papat, T. Karanfil,  
782 and D. L. Freedman. medRxivCOVID-19 Wastewater Epidemiology: A Model to Estimate Infected Popula-  
tions. *medRxiv*, Nov 2020.
- [72] A. N. M. Kraay, A. F. Brouwer, N. Lin, P. A. Collender, J. V. Remais, and J. N. S. Eisenberg. Proc Natl Acad  
784 Sci U S A Modeling environmentally mediated rotavirus transmission: The role of temperature and hydrologic  
786 factors. *Proc Natl Acad Sci U S A*, 115(12):E2782–E2790, 03 2018.
- [73] G. La Rosa, P. Mancini, G. Bonanno Ferraro, C. Veneri, M. Iaconelli, L. Lucentini, L. Bonadonna, S. Brusaferrò,  
788 D. Brandtner, A. Fasanella, L. Pace, A. Parisi, D. Galante, and E. Suffredini. Water ResRapid screening for  
SARS-CoV-2 variants of concern in clinical and environmental samples using nested RT-PCR assays targeting  
790 key mutations of the spike protein. *Water Res*, 197:117104, Jun 2021.
- [74] S. Agrawal, L. Orschler, S. Schubert, K. Zachmann, L. Heijnen, S. Tavazzi, B. M. Gawlik, M. de Graaf,  
792 G. Medema, and S. Lackner. A pan-European study of SARS-CoV-2 variants in wastewater under the EU  
Sewage Sentinel System. *medRxiv*, Jun 2021.
- [75] Katharina Jahn, David Dreifuss, Ivan Topolsky, Anina Kull, Pravin Ganesanandamoorthy, Xavier Fernandez-  
794 Cassi, Carola Bänziger, Elyse Stachler, Lara Fuhrmann, Kim Philipp Jablonski, Chaoran Chen, Catharine  
796 Aquino, Tanja Stadler, Christoph Ort, Tamar Kohn, Timothy R. Julian, and Niko Beerenwinkel. Detection of  
sars-cov-2 variants in switzerland by genomic analysis of wastewater samples. *medRxiv*, 2021.
- [76] E. T. Landaas, M. L. Storm, M. C. Tollanes, R. Barlinn, A. B. Kran, K. Bragstad, A. Christensen, and  
798 T. Andreassen. Diagnostic performance of a SARS-CoV-2 rapid antigen test in a large, Norwegian cohort. *J  
800 Clin Virol*, 137:104789, 04 2021.
- [77] Di Tian, Zhen Lin, Ellie M. Kriner, Dalton J. Esneault, Jonathan Tran, Julia C. DeVoto, Naima Okami, Rachel  
802 Greenberg, Sarah Yanofsky, Swarnamala Ratnayaka, Nicholas Tran, Maeghan Livaccari, Marla Lampp, Noel  
Wang, Scott Tim, Patrick Norton, John Scott, Tony Y. Hu, Robert Garry, Patrice Delafontaine, Lee Hamm,  
804 and Xiao-Ming Yin. Sars-cov-2 load does not predict transmissibility in college students. *medRxiv*, 2021.
- [78] M. D. Folgueira, J. Luczkowiak, F. Lasala, A. Perez-Rivilla, and R. Delgado. Prolonged SARS-CoV-2 cell  
806 culture replication in respiratory samples from patients with severe COVID-19. *Clin Microbiol Infect*, Feb  
2021.



## Wastewater-Based Epidemic Modelling

---

- 808 [79] A. A. Sayampanathan, C. S. Heng, P. H. Pin, J. Pang, T. Y. Leong, and V. J. Lee. Infectivity of asymptomatic  
versus symptomatic COVID-19. *Lancet*, 397(10269):93–94, 01 2021.
- 810 [80] L. K. Kociolek, W. J. Muller, R. Yee, J. Dien Bard, C. A. Brown, P. A. Revell, H. Wardell, T. J. Savage, S. Jung,  
812 S. Dominguez, B. A. Parikh, R. C. Jerris, S. C. Kehl, A. Campigotto, J. M. Bender, X. Zheng, E. Muscat,  
M. Linam, L. Abuogi, C. Smith, K. Graff, A. Hernandez-Leyva, D. Williams, and N. R. Pollock. Comparison  
814 of Upper Respiratory Viral Load Distributions in Asymptomatic and Symptomatic Children Diagnosed with  
SARS-CoV-2 Infection in Pediatric Hospital Testing Programs. *J Clin Microbiol*, 59(1), 12 2020.
- [81] Stephen M. Kissler, Joseph R. Fauver, Christina Mack, Scott W. Olesen, Caroline Tai, Kristin Y. Shiue,  
816 Chaney C. Kalinich, Sarah Jednak, Isabel M. Ott, Chantal B.F. Vogels, Jay Wohlgenuth, James Weisberger,  
John DiFiori, Deverick J. Anderson, Jimmie Mancell, David D. Ho, Nathan D. Grubaugh, and Yonatan H.  
818 Grad. Sars-cov-2 viral dynamics in acute infections. *medRxiv*, 2020.
- [82] Daniel Owusu, Mary A Pomeroy, Nathaniel M Lewis, Ashutosh Wadhwa, Anna R Yousaf, Brett Whitaker,  
820 Elizabeth Dietrich, Aron J Hall, Victoria Chu, Natalie Thornburg, Kimberly Christensen, Tair Kiphibane,  
Sarah Willardson, Ryan Westergaard, Trivikram Dasu, Ian W Pray, Sanjib Bhattacharyya, Angela Dunn,  
822 Jacqueline E Tate, Hannah L Kirking, Almea Matanock, and Household Transmission Study Team. Persistent  
SARS-CoV-2 RNA Shedding without Evidence of Infectiousness: A Cohort Study of Individuals with COVID-  
824 19. *The Journal of Infectious Diseases*, 02 2021. jia107.
- [83] Sukbin Jang, Ji-Young Rhee, Yu Mi Wi, and Bo Kyeong Jung. Viral kinetics of sars-cov-2 over the preclinical,  
826 clinical, and postclinical period. *International Journal of Infectious Diseases*, 102:561–565, 2021.
- [84] Nadège Néant, Guillaume Lingas, Quentin Le Hingrat, Jade Ghosn, Ilka Engelmann, Quentin Lepiller, Alexan-  
828 dre Gaymard, Virginie Ferré, Cédric Hartard, Jean-Christophe Plantier, Vincent Thibault, Julien Marlet,  
Brigitte Montes, Kevin Bouiller, François-Xavier Lescure, Jean-François Timsit, Emmanuel Faure, Julien  
830 Poissy, Christian Chidiac, François Raffi, Antoine Kimmoun, Manuel Etienne, Jean-Christophe Richard, Pierre  
Tattevin, Denis Garot, Vincent Le Moing, Delphine Bachelet, Coralie Tardivon, Xavier Duval, Yazdan Yaz-  
832 danpanah, France Mentré, Cédric Laouénan, Benoit Visseaux, and Jérémie and Guedj. Modeling sars-cov-2  
viral kinetics and association with mortality in hospitalized patients from the french covid cohort. *Proceedings  
834 of the National Academy of Sciences*, 118(8), 2021.
- [85] Jared Bullard, Kerry Dust, Duane Funk, James E Strong, David Alexander, Lauren Garnett, Carl Boodman,  
836 Alexander Bello, Adam Hedley, Zachary Schiffman, Kaylie Doan, Nathalie Bastien, Yan Li, Paul G Van Cae-  
seele, and Guillaume Poliquin. Predicting Infectious Severe Acute Respiratory Syndrome Coronavirus 2 From  
838 Diagnostic Samples. *Clinical Infectious Diseases*, 71(10):2663–2666, 05 2020.
- [86] C. Faes, S. Abrams, D. Van Beckhoven, G. Meyfroidt, E. Vlieghe, N. Hens, A. S. Aouachria, K. Bafort,  
840 L. Belkhir, N. Bossuyt, V. Colombie, N. Dauby, P. De Munter, J. Deblonde, D. Delmarcelle, M. Del-  
vallee, R. Demeester, T. Dugernier, X. Holemans, B. Kerzmann, P. Y. Machurot, P. Minette, J. M. Minon,  
842 S. Mokrane, C. Nachtergal, S. Noirhomme, D. Pierard, C. Rossi, C. Schirvel, E. Sermijn, F. Staelens, F. Triest,  
N. Van Goethem, J. Van Praet, A. Vanhoenacker, S. Cooreman, E. Willems, and C. Wyndham-Thomas. Time  
844 between Symptom Onset, Hospitalisation and Recovery or Death: Statistical Analysis of Belgian COVID-19  
Patients. *Int J Environ Res Public Health*, 17(20), 10 2020.
- 846 [87] Till Hoffmann and Justin Alsing. Faecal shedding models for sars-cov-2 rna amongst hospitalised patients and  
implications for wastewater-based epidemiology. *medRxiv*, 2021.
- 848 [88] K. Mizumoto, K. Kagaya, A. Zarebski, and G. Chowell. Estimating the asymptomatic proportion of coronavirus  
disease 2019 (COVID-19) cases on board the Diamond Princess cruise ship, Yokohama, Japan, 2020. *Euro  
850 Surveill*, 25(10), 03 2020.
- [89] H. Nishiura, T. Kobayashi, T. Miyama, A. Suzuki, S. M. Jung, K. Hayashi, R. Kinoshita, Y. Yang, B. Yuan,  
852 A. R. Akhmetzhanov, and N. M. Linton. Estimation of the asymptomatic ratio of novel coronavirus infections  
(COVID-19). *Int J Infect Dis*, 94:154–155, 05 2020.
- 854 [90] D. Buitrago-Garcia, D. Egli-Gany, M. J. Counotte, S. Hossmann, H. Imeri, A. M. Ipekci, G. Salanti, and  
N. Low. Occurrence and transmission potential of asymptomatic and presymptomatic SARS-CoV-2 infections:  
856 A living systematic review and meta-analysis. *PLoS Med*, 17(9):e1003346, 09 2020.

## Wastewater-Based Epidemic Modelling

---

- 858 [91] Muge Cevik, Matthew Tate, Ollie Lloyd, Alberto Enrico Maraolo, Jenna Schafers, and Antonia Ho. Sars-cov-2, sars-cov, and mers-cov viral load dynamics, duration of viral shedding, and infectiousness: a systematic review and meta-analysis. *The Lancet Microbe*, 2(1):e13–e22, 2021.
- 860 [92] Rita Jaafar, Sarah Aherfi, Nathalie Wurtz, Clio Grimaldier, Thuan Van Hoang, Philippe Colson, Didier Raoult, and Bernard La Scola. Correlation Between 3790 Quantitative Polymerase Chain Reaction–Positives Samples and Positive Cell Cultures, Including 1941 Severe Acute Respiratory Syndrome Coronavirus 2 Isolates. *Clinical Infectious Diseases*, 09 2020. ciae1491.
- 862 [93] Dorothy Anderson and Ray Watson. On the spread of a disease with gamma distributed latent and infectious periods. *Biometrika*, 67(1):191–198, 1980.
- 864 [94] Anne Weiss, Mads Jellingso, and Morten Otto Alexander Sommer. Spatial and temporal dynamics of sars-cov-2 in covid-19 patients: A systematic review and meta-analysis. *EBioMedicine*, 58:102916, 2020.
- 866 [95] Amy E Benefield, Laura A Skrip, Andrea Clement, Rachel A Althouse, Stewart Chang, and Benjamin Muir Althouse. Sars-cov-2 viral load peaks prior to symptom onset: a systematic review and individual-pooled analysis of coronavirus viral load from 66 studies. *medRxiv*, 2020.
- 868 [96] Mathilde Bellon, Stephanie Baggio, Frederique Jacquerioz Bausch, Hervé Spechbach, Julien Salamun, Camille Genecand, Aglae Tardin, Laurent Kaiser, Arnaud G L’Huillier, and Isabella Eckerle. SARS-CoV-2 viral load kinetics in symptomatic children, adolescents and adults. *Clinical Infectious Diseases*, 05 2021.
- 872 [97] Fuminari Miura, Masaaki Kitajima, and Ryosuke Omori. Duration of sars-cov-2 viral shedding in faeces as a parameter for wastewater-based epidemiology: Re-analysis of patient data using a shedding dynamics model. *Science of The Total Environment*, 769:144549, 2021.
- 874 [98] Wen-Cheng Liu and Wei-Cher Huang. Modeling the transport and distribution of fecal coliform in a tidal estuary. *Science of The Total Environment*, 431:1–8, 2012.
- 876 [99] Christopher Staley, Kenneth H. Reckhow, Jerzy Lukasik, and Valerie J. Harwood. Assessment of sources of human pathogens and fecal contamination in a florida freshwater lake. *Water Research*, 46(17):5799–5812, 2012.
- 880 [100] Rob Jamieson, Doug M. Joy, Hung Lee, Ray Kostaschuk, and Robert Gordon. Transport and deposition of sediment-associated escherichia coli in natural streams. *Water Research*, 39(12):2665–2675, 2005.
- 882 [101] Bhuban Ghimire and Zhiqiang Deng. Hydrograph-based approach to modeling bacterial fate and transport in rivers. *Water Research*, 47(3):1329–1343, 2013.
- 884 [102] Sen Bai and Wu-Seng Lung. Modeling sediment impact on the transport of fecal bacteria. *Water Research*, 39(20):5232–5240, 2005.
- 886 [103] Kyung Hwa Cho, Yakov A. Pachepsky, David M. Oliver, Richard W. Muirhead, Yongeun Park, Richard S. Quilliam, and Daniel R. Shelton. Modeling fate and transport of fecally-derived microorganisms at the watershed scale: State of the science and future opportunities. *Water Research*, 100:38–56, 2016.
- 888 [104] Chris R. Rehmann and Michelle L. Soupir. Importance of interactions between the water column and the sediment for microbial concentrations in streams. *Water Research*, 43(18):4579–4589, 2009.
- 890 [105] Octave Levenspiel. *The Dispersion Model*, pages 47–70. Springer New York, New York, NY, 2012.
- 892 [106] A McDonald, D Kay, and A Jenkins. Generation of fecal and total coliform surges by stream flow manipulation in the absence of normal hydrometeorological stimuli. *Applied and Environmental Microbiology*, 44(2):292–300, 1982.
- 894 [107] J. W. Nagels, R. J. Davies-Colley, A. M. Donnison, and R. W. Muirhead. Faecal contamination over flood events in a pastoral agricultural stream in New Zealand. *Water Sci Technol*, 45(12):45–52, 2002.
- 896
- 898

## Wastewater-Based Epidemic Modelling

---

### 900 Appendix

## Wastewater-Based Epidemic Modelling

---

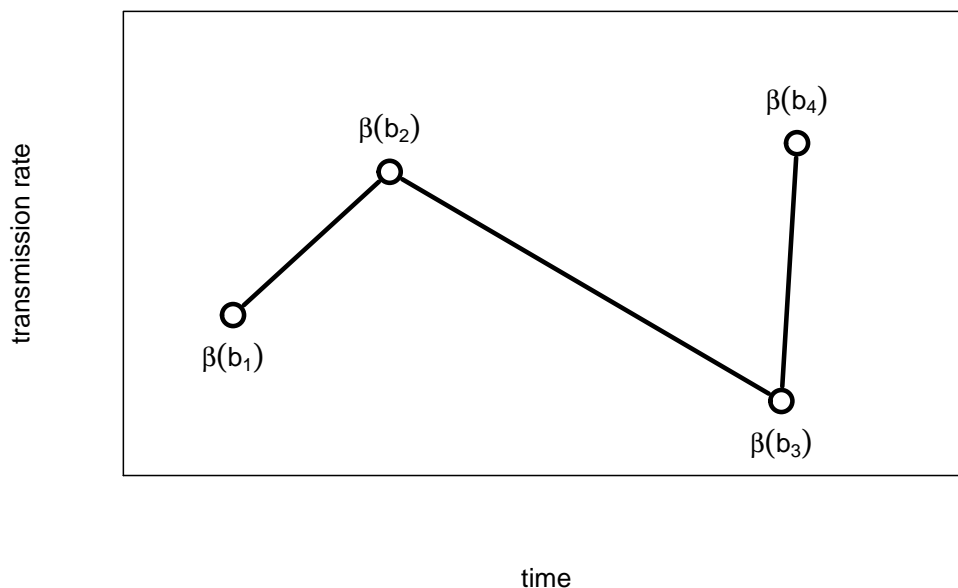

Figure S1: Illustration of the piecewise linear function to model the transmission rate  $\beta_t$ . The break dates  $b_1, b_2, \dots$  are chosen manually by visual inspection of the time series of interest, and the values  $\beta(b_i)$  are fitted with an ABC algorithm.

### A-1 Fitting procedure

902 To fit the model to the clinical and/or wastewater surveillance data, we model the transmission  
903 rate,  $\beta_t$  as a piecewise linear function. We parsimoniously choose the times  $b_1, b_2, \dots$   
904 (“break times”) defining each segment by visual inspection of the time series (*i.e.*, incidence  
905 of new COVID-19 cases and/or hospitalizations for clinical surveillance; SARS-CoV-2 con-  
906 centration for wastewater surveillance). Those times should correspond to changes in the  
transmission dynamics. The value of the transmission rate at a break date,  $\beta(b_i)$  is fit-  
908 ted using an Approximate Bayesian Computation (ABC). We chose not to fit the break  
times  $b_i$  because the fitting algorithm would require a computation time that would not be  
910 practical. See [Figure S1](#).

The mean transit time  $\bar{\tau}$  and the scaling factor  $\omega$  are also fitted to data. For those param-  
912 eters, the goal is primarily to allow for uncertainty rather than infer a posterior distribution  
as they are essentially not identifiable. Finally, the hospitalization rate is also fitted to the  
914 hospitalization data, when available.

## Wastewater-Based Epidemic Modelling

---

Over the study period (from early March 2020 to June 1st, 2021), we have about a dozen  
916 break times  $b_i$  for each city to reflect the various interventions (*e.g.*, lockdowns) or behaviour  
(*e.g.*, change in contact rate when schools re-opened in September 2020). Hence, the  
918 parameter space to explore by the ABC algorithm is relatively large. To avoid unpractical  
computational times, we defined relative strong priors on all parameters, that is normal  
920 distributions with a mean close to the expected value (explored manually) and a relatively  
broad standard deviation (corresponding approximately to a coefficient of variation of  
922 0.5). The normal distribution was censored to positive values. The outputs of the fitting  
procedure for all locations are shown in supplementary file File S2.

### 924 A-2 Relative infectiousness

In [Equation 1a](#), the force of infection from symptomatic cases is  $\beta \sum_{k=1}^{n_I} \psi_k I_k$ . For convenience,  
926 the  $\psi_k$  are chosen such that

$$\sum_{k=1}^{n_I} \psi_k = n_I. \quad (\text{A.1})$$

Hence, when the infectiousness profile is constant ( $\lambda_k = 1$ , for  $k = 1, \dots, n_I$ ), the force of  
928 infection is  $\beta \sum_{k=1}^{n_I} I_k$ . Using this normalization allows to keep a single baseline parameter  
 $\beta$ . Only the *relative* values of the  $\psi_k$  affect the infectiousness profile. Similarly for  
930 asymptomatic infections, the parameters  $\phi_k$  are chosen such that  $\sum_{k=1}^{n_A} \phi_k = n_A$ .

We assume the infectious period for symptomatic infections is 12 days on average [91,  
932 92, 85, 82] and divide this period into  $n_I = 6$  sub-compartments  $I_1, \dots, I_6$  where infected  
individuals will stay, on average, 2 days in each of them. Note that with this representation,  
934 the duration of infectiousness has an Erlang distribution [93] with shape  $n_I$  (and mean  
12 days). The parameter  $\psi_k$  represents the relative infectiousness of sub-compartment  
936  $I_k$ . We assume infectiousness, that is the probability of transmission given contact, is  
proportional to the log viral load measured from respiratory samples in clinical studies  
938 [83, 84] and choose  $\tilde{\psi} = (3, 6, 5, 4, 3, 2)$  and then normalize according to [Equation A.1](#) with  
 $\psi_k = n_I \tilde{\psi}_k / \sum_k \tilde{\psi}_k$ .

940 Similarly, we assume a shorter infectious period for asymptomatic infections of 10 days on  
average [94, 91], divided into  $n_A = 5$  sub-compartments with an average stay of 2 days  
942 each.

### A-3 Respiratory and faecal Viral kinetics

944 Our model explicitly accounts for the temporal profile of respiratory shedding via the multi-  
ple sub-compartments for the infectious states ( $A$ ,  $I$  and  $J$ ) combined with the parameters  
946  $\phi$  and  $\psi$ . Similarly, it explicitly accounts for the faecal shedding kinetics via the shedding  
states ( $A$ ,  $I$ ,  $J$  and  $Z$ ) and the parameters  $\lambda$ .

## Wastewater-Based Epidemic Modelling

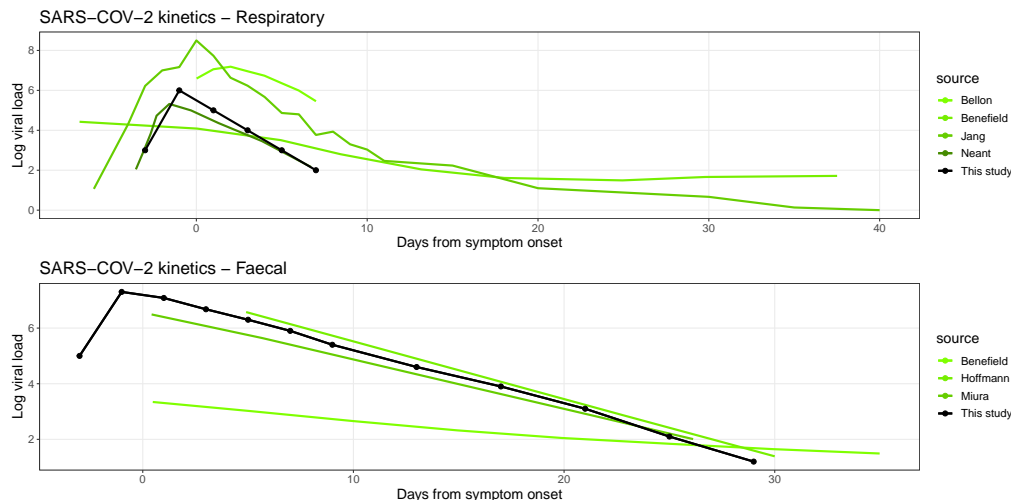

Figure S2: SARS-CoV-2 viral kinetics. The values used in our model are represented by the black curve and the green curves show estimates from the literature. The full reference of each study can be found in the bibliography: Benefield [95], Bellon [96], Jang [83], Neant [84], Hoffmann [87], Miura [97].

948 We parameterize our model such that the SARS-CoV-2 viral kinetics reflect with levels  
 reported in the literature. The black line with points in Figure S2 shows the values used  
 950 for respiratory (top panel) and faecal (bottom panel) shedding, and how they compare to  
 observational studies.

### 952 A-4 Effective reproduction number

As a first step, we establish the *basic* reproduction number,  $\mathcal{R}_0$ , for the model defined by  
 954 equations 1a-1n. To derive  $\mathcal{R}_0$ , we follow the methodology presented in [42].

Asymptomatic individuals are infectious for an average duration of  $1/\theta$ , and the ratio of  
 956 their infectiousness compared to all the other infectious states ( $I$  and  $J$ ) is  $\xi$ . Asymptomatic  
 incidence is a proportion  $\alpha$  of the overall incidence. Hence, the contribution to the basic  
 958 reproduction number from the asymptotically infected individuals is

$$\mathcal{R}_0^A = \beta\alpha\xi/\theta \quad (\text{A.2})$$

Infectious individuals that are symptomatic and that will recover without hospitalization  
 960 ( $I$ ) are infectious for an average duration of  $1/\nu$ . Their proportion of the overall incidence  
 is calculated by simply stating they are not hospitalized ( $1 - h$ ) and not asymptomatic  
 962 ( $1 - \alpha$ ), hence the proportion is  $(1 - h)(1 - \alpha)$ . The contribution to the basic reproduction  
 number from the symptomatically infected individuals that will not require hospitalization

## Wastewater-Based Epidemic Modelling

---

964 is

$$\mathcal{R}_0^I = \beta(1-h)(1-\alpha)/\nu \quad (\text{A.3})$$

For the symptomatically infected persons that will require hospitalization ( $J$ ), the same logic applies to the  $I$  sub-group, except that we need to take into account their relative infectiousness compared to  $I$ , which is  $\sum_{k=1}^{n_J} \psi_k / \sum_{k=1}^{n_I} \psi_k$ . Note that the denominator is simply  $n_I$  thanks to the normalization defined in [Equation A.1](#). The subgroup in state  $J$  are hospitalized ( $h$ ) and not asymptomatic ( $1-\alpha$ ) so their contribution to the basic reproduction number is

$$\mathcal{R}_0^J = \frac{\sum_{k=1}^{n_J} \psi_k}{n_I} \beta h (1-\alpha) / \mu \quad (\text{A.4})$$

We obtain the (overall) basic reproduction number by summing the respective contributions from all infectious epidemiological states

$$\mathcal{R}_0 = \mathcal{R}_0^A + \mathcal{R}_0^I + \mathcal{R}_0^J \quad (\text{A.5})$$

Finally, the *effective* reproduction number  $\mathcal{R}_t$  is simply defined as  $\mathcal{R}_t = \frac{S_t}{N} \mathcal{R}_0$  which gives [Equation 2](#) in the main text.

### A-5 Fate and RNA transport in wastewater

976 Upon fecal deposition into the wastewater, viral RNA undergoes various hydrodynamic processes and degrades during its journey from the shedding point to the sampling site [\[16, 33\]](#).  
978 This degradation mainly comes from RNA dilution in municipal wastewater constitutes (*e.g.*, hygiene products, household detergents, industrial wastewater and storm waters) and RNA decay resulting from harsh wastewater environment (*e.g.*, temperature, bioactive chemicals, solids, pH, etc.). As a common practice, complex hydraulic models simulate  
982 the in-fluid transportation of the water contaminants (endemic viruses and fecal microorganisms) via solving a set of physics-based differential equations describing the flow and transport mechanisms [\[98, 99, 100, 101, 102, 103, 104\]](#).

These hydrodynamical models are advection and dispersion mechanisms, which describe the microorganisms' transportation by the flow velocity along the longitudinal axis and its diluting process into the surrounding fluid [\[103\]](#). Once a mass concentration enters the stream, it gradually disperses due to many physical factors such as dissolving process, velocity profile, turbulent mixing, molecular diffusion, etc. [\[105\]](#). Moreover, sediment association plays a significant role in the transport models. Several studies indicated attachments of microorganisms to sediments and the impact of this associations on their delayed transportation [\[104, 102, 100\]](#). Due to solid mass and subsequent gravitational pull, sediment's velocity differs from the flow velocity and results in solid settlement at the bottom of the stream. These microorganism-attached sediments, later, re-suspend during overflow periods, induced by heavy rainfall and industrial discharges, and act as a reservoir

## Wastewater-Based Epidemic Modelling

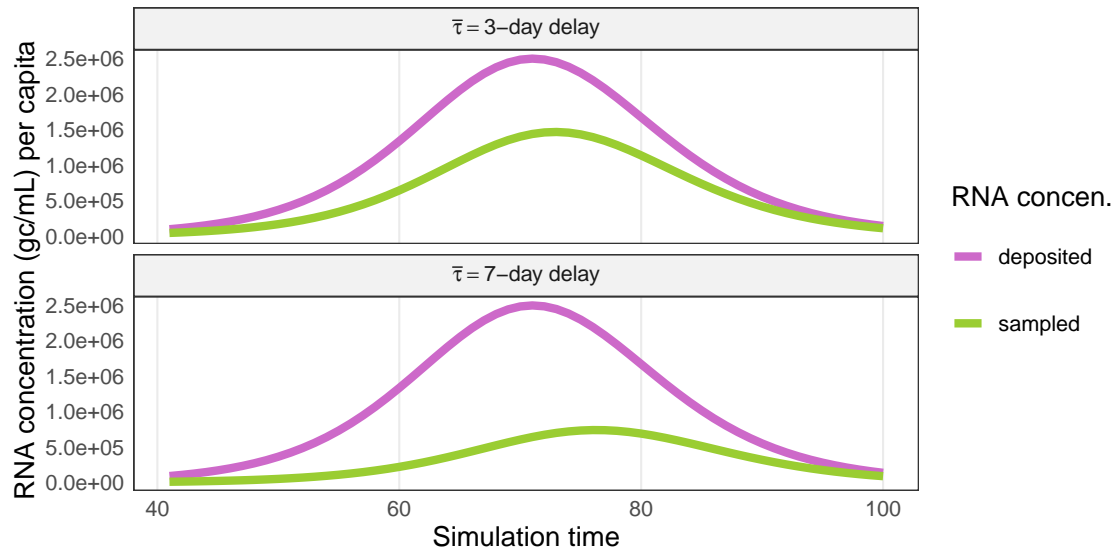

Figure S3: Impact of advection-dispersion-decay model (Eq. A.8). sampled RNA concentration ( $W_{samp}$ ) may have different viral distribution compared to deposited density ( $W^*$ ) due to delayed viral genetic materials resulting from hydrodynamical phenomenon in sewer system.

996 and increase in-stream microorganism's concentration irrespective of new input from the  
shedding source [106, 107]. Enveloped viruses, such as SARS-CoV-2, dissolve less in water  
998 and tends to attach to solids as a result of their hydrophobic envelope [39, 33], and there-  
fore, settlement/resuspension may play a key role in transportation of the SARS-CoV-2  
1000 genetic materials in wastewater.

Here, we used a simple advection-dispersion-decay model to simulate the fate of SARS-  
1002 CoV-2 RNA along their journey from shedding points to the sampling site. We assumed the  
deposited RNA concentration in the sewage system is a one-time pulse input per day and  
1004 described the transfer process by a dispersed plug-flow model. As the plug concentration of  
viral RNA enters into the flow with velocity  $u$ , it gradually disperses along the longitudinal  
1006 axis (flow direction) with dispersion coefficient  $\mathcal{D}$  ( $\text{m}^2/\text{s}$ ) within the sewage pathway. The  
length from the shedding location to the sampling site is  $L$ . The total RNA mass arrives  
1008 at the sampling point gradually over time, such that the daily pulse input concentration  
is delayed. Assuming a small deviation from plug flow ( $\mathcal{D}/uL \leq 0.01$ ), we can use the  
1010 analytical solution of the 1-dimensional axial dispersed plug flow differential equation [47,  
105] as a transfer function for viral RNA in wastewater. For low diffusion limit, the transfer  
1012 function is approximately symmetrical and defined by a Gaussian distribution  $g(\tau)$ , which  
represents the fraction of the deposited concentration at the sampling site  $\tau$  days after its



## Wastewater-Based Epidemic Modelling

---

1014 introduction to the sewage system

$$g(\tau) = \sqrt{\frac{u^3}{4\pi DL}} \exp\left(-\frac{(L - u\tau)^2}{4DL/u}\right). \quad (\text{A.6})$$

1016 Defining the mean transit time  $\bar{\tau} = L/u$  and its standard deviation  $\sigma = \sqrt{2DL/u^3}$ , we can re-parametrize Equation A.6 based on the first two moments of the transit time:

$$g(\tau) = \frac{1}{\sqrt{2\pi}\sigma} \exp\left(-\frac{(\tau - \bar{\tau})^2}{2\sigma^2}\right), \quad (\text{A.7})$$

1018 In addition to delay, the genetic materials of SARS-CoV-2 degrades exponentially at a daily rate  $\kappa$  due to the complex environment of wastewater [46]. As a result,  $W(t)$ , the sampled concentration at time  $t$ , is a combination of both delayed viral materials and degradation  
1020

$$W_{\text{samp}}(t) = \int_0^t W^*(t - \tau) g(\tau) e^{-\kappa\tau} d\tau, \quad (\text{A.8})$$

where  $W^*$  is the initial daily deposited concentration.

### 1022 A-6 $\mathcal{R}_t$ posterior estimates

1024 The effective reproduction number  $\mathcal{R}_t$  is estimated by fitting the model to different data sources (see main text). We also estimate  $\mathcal{R}_t$  using the R library EpiEstim [57] on reported cases.

1026 The function  $\beta_t$  is modelled as piecewise-linear. As a result,  $\mathcal{R}_t$  from Eq. 2 is also a piecewise linear function. We interpolated  $\mathcal{R}_t$  with a polynomial curve (by smooth spline function in R) for Figure 4. For validity purpose, we compared the interpolated and the piecewise linear function  $\mathcal{R}_t$  and checked the smoothed and actual curves are similar. See  
1030 Figure S5.

## Wastewater-Based Epidemic Modelling

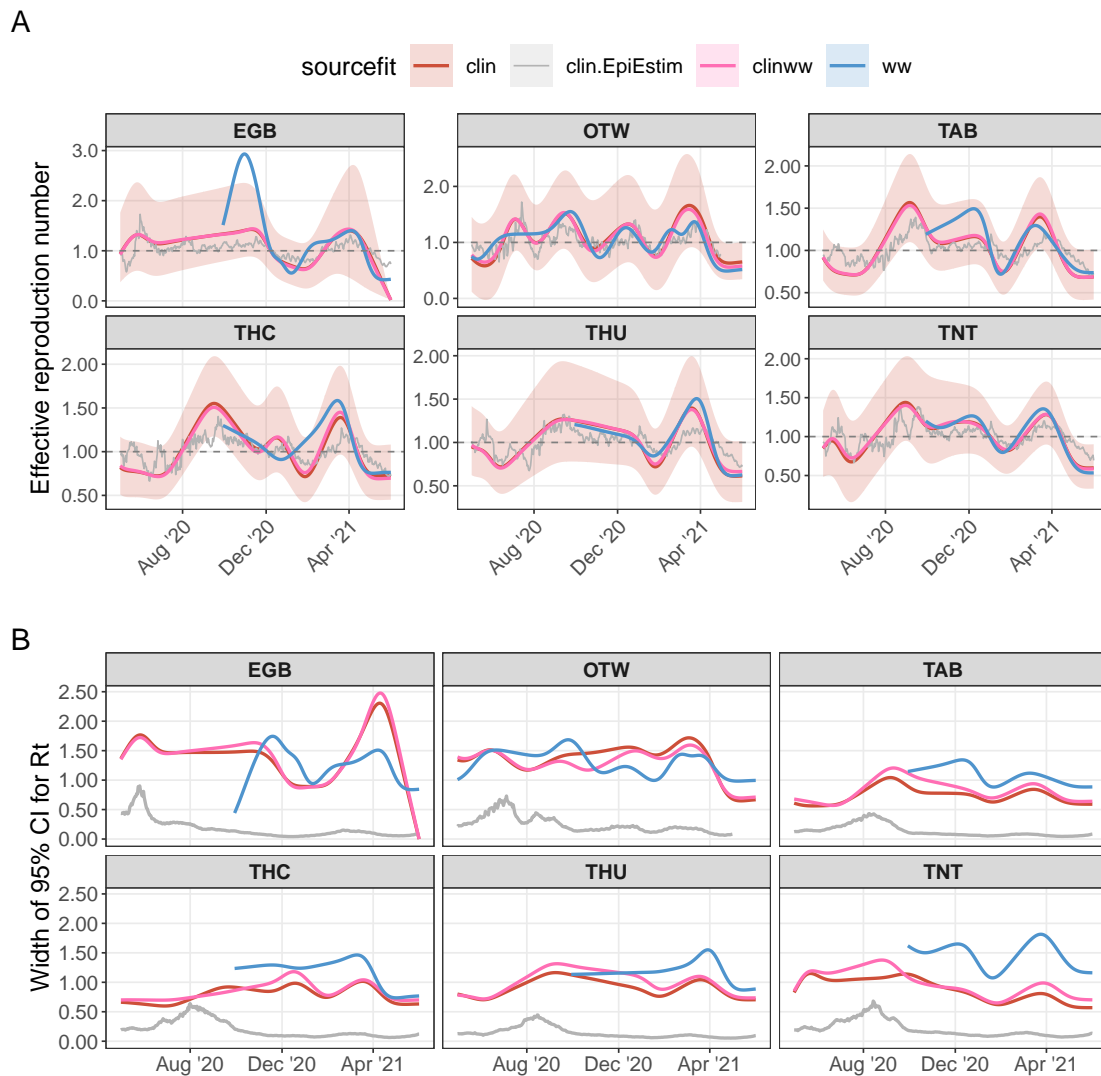

Figure S4: Panel A: Effective reproduction number inferred from model, utilizing different data sources, for all WWTP's locations.  $R_t$  inferred by fitted model to clinical reported cases (clin), RNA wastewater concentration (ww), and both clinical reported cases and viral load in wastewater (combined clinww). Panel B: Associated 95% credible interval widths.

## Wastewater-Based Epidemic Modelling

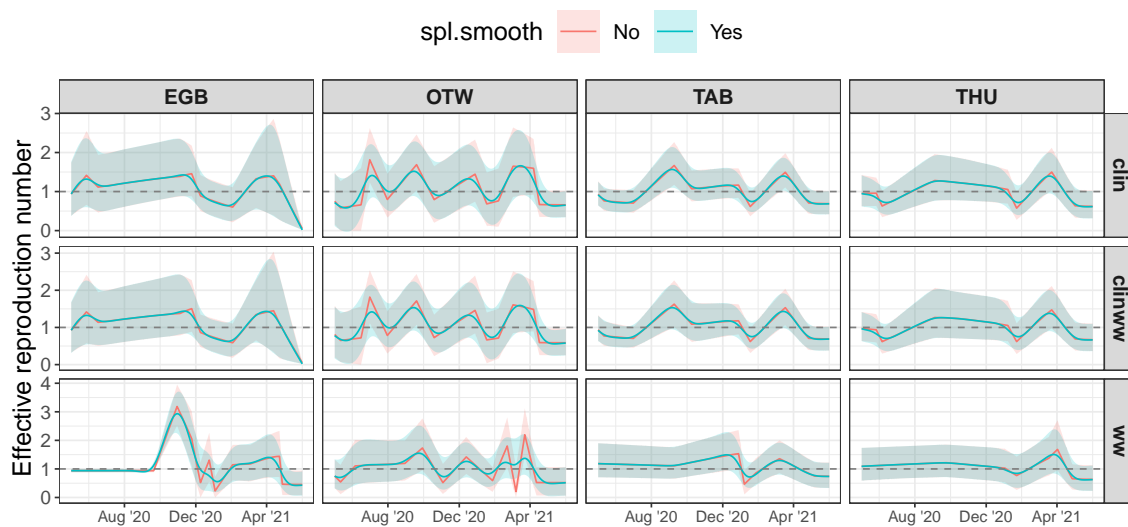

Figure S5: The effective reproduction number and its 95% credible interval plotted for different sources (clin, ww and combined clinww) of fitting in wastewater sampling locations; Edmonton (EGB), Ottawa (OTW), Toronto Ashbridges Bay (TAB) and Toronto Humber (THU). Colours represent  $R_t$  obtained from model and Eq. 2 (pink) and its interpolated smoothed spline (green).
